# Supplementary material for: A Jovian Magnetodisc Model for the Juno Era
Source: PubMed Central journal article supplement (PMC7583372; doi:10.1029/2020ja028138), 2020-09-25

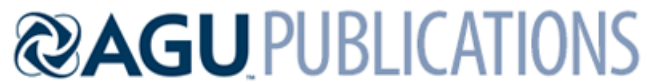

*Journal of Geophysical Research – Space Physics*

Supporting information for

**A Jovian Magnetodisc Model for the Juno Era**

**J. E. P. Connerney<sup>1,2</sup>, S. Timmins<sup>2</sup>, M. Herceg<sup>3</sup>, and J. L. Joergensen<sup>3</sup>**

<sup>1</sup>Space Research Corporation, Annapolis, MD 21403

<sup>2</sup>Nasa Goddard Space Flight Center, Greenbelt, MD 20771

<sup>3</sup>Technical University of Denmark (DTU), Kongens Lyngby, 2800, Denmark

Correspondence to: [Jack.Connerney@nasa.gov](mailto:Jack.Connerney@nasa.gov)

**Contents of this file:**

Figs. S1 to S23

Table S1

**Additional Supporting Information (Files uploaded separately)**

Not Applicable

**Figures S1-S23:** Perturbation plots for Juno periapsis passes 1-24 (PeriJoves PJ 1, PJ3-PJ24), illustrating a comparison of the observed vector magnetic field (after removal of the internal field using the JRM09 model) and the modeled ( $r < 30 R_j$ ) magnetodisc field, using the model fit parameters listed in Table 1. From top to bottom we plot the azimuthal, theta, and radial components of the observed (black) and modeled (blue) field. The shaded region represents a strong field region ( $> 1600$  nT) dominated by the planetary field and excluded from consideration.

Table 1: Magnetodisc Parameters

| Parameter   | Value | Description                    | Units        |
|-------------|-------|--------------------------------|--------------|
| <b>R0</b>   | 7.8   | Disc inner radius              | Jovian radii |
| <b>R1</b>   | 51.4  | Disc outer radius              | Jovian radii |
| <b>D</b>    | 3.6   | Half thickness                 | Jovian radii |
| $\mu_0 I/2$ | 139.6 | Current constant               | nT           |
| $\theta_D$  | 9.3   | Disc normal from rotation axis | degrees      |
| $\varphi_D$ | 204.2 | Azimuth angle of disc normal   | degrees      |

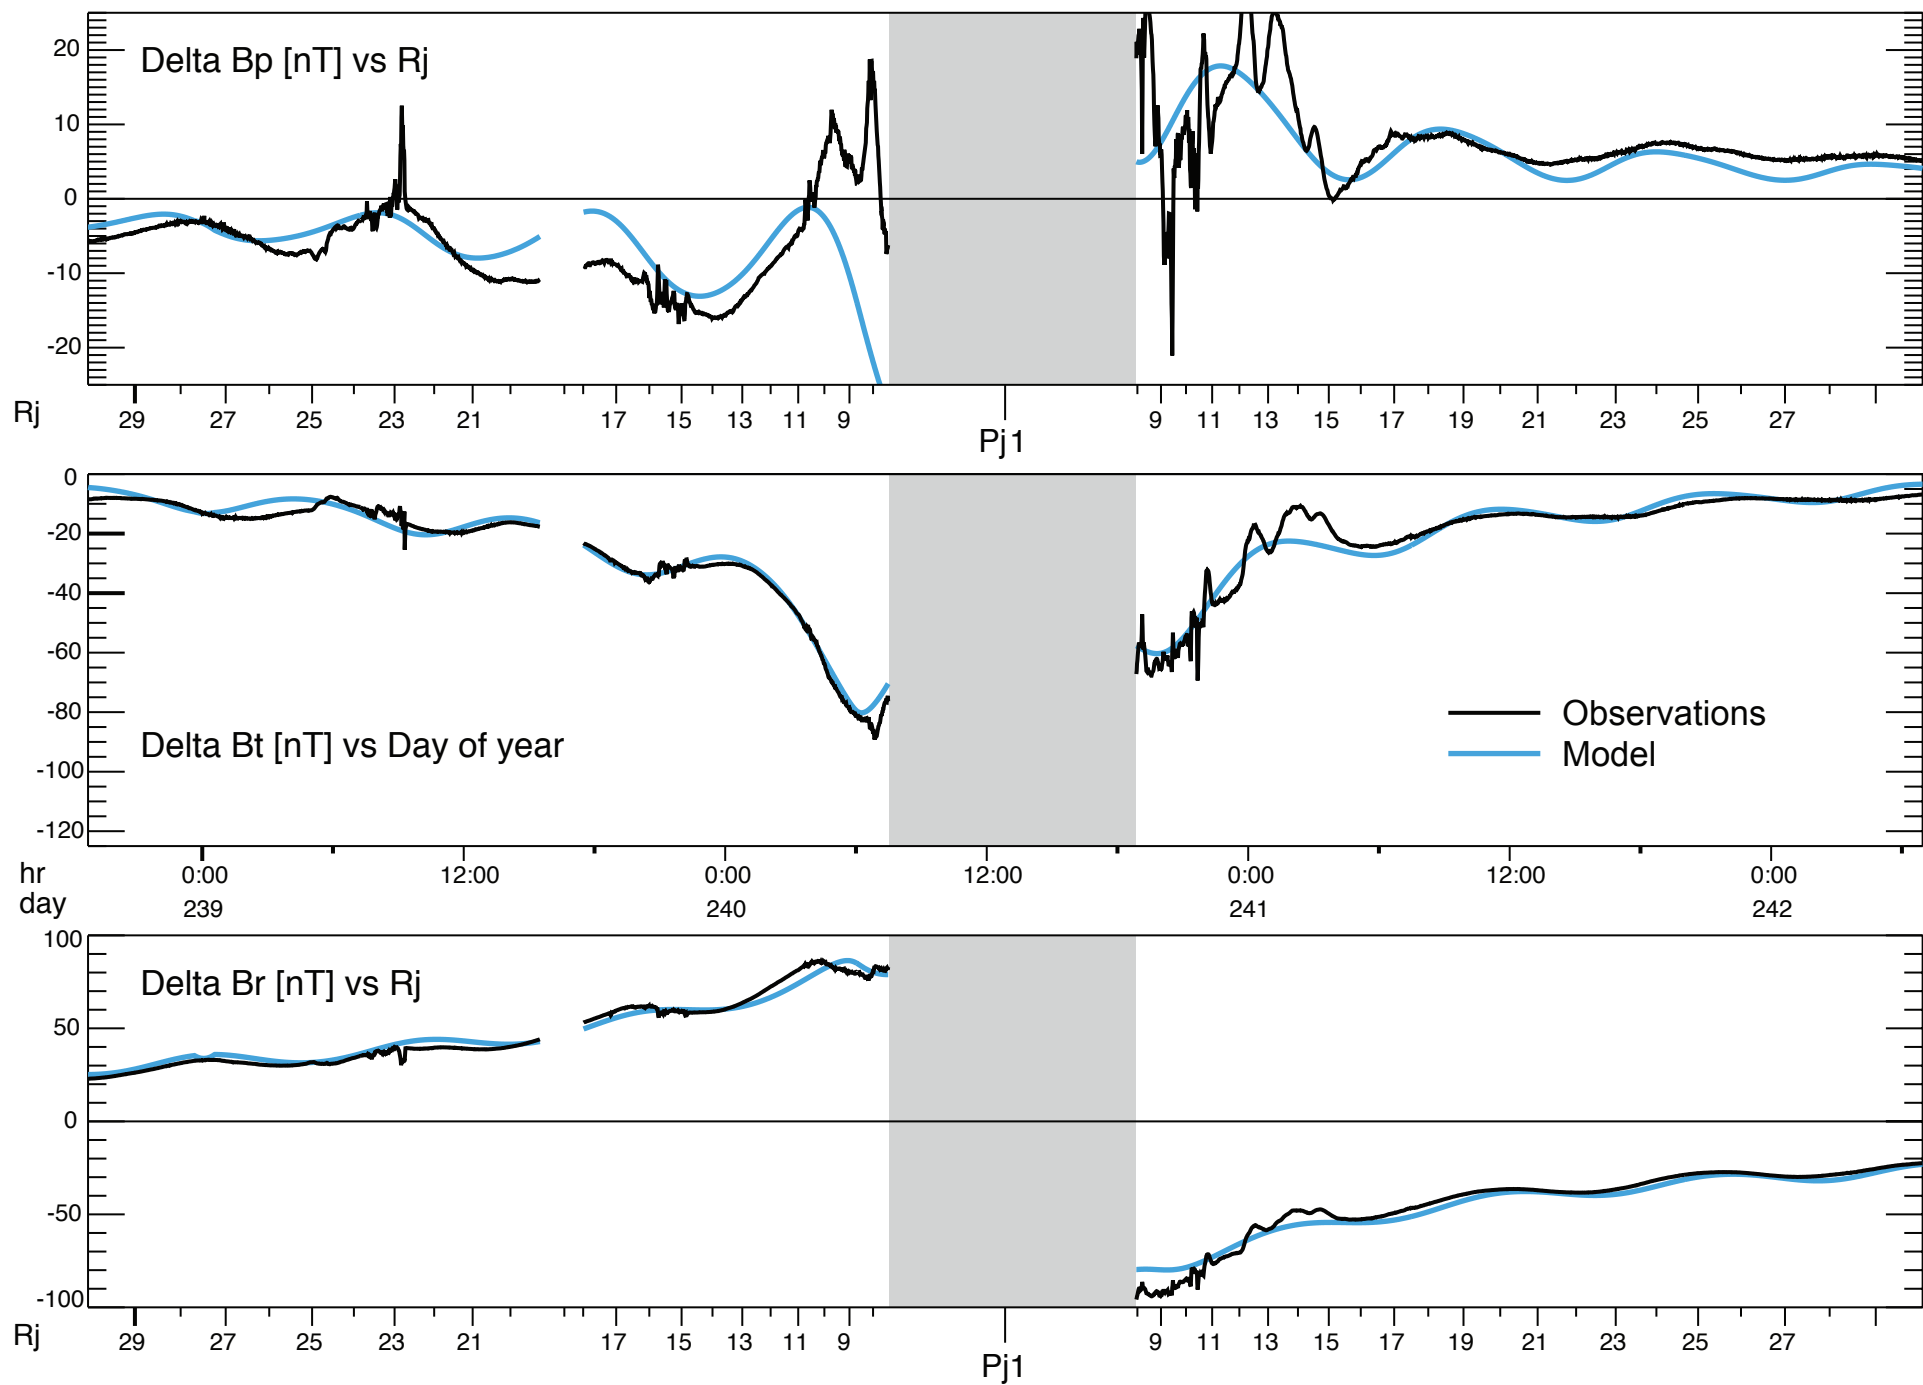

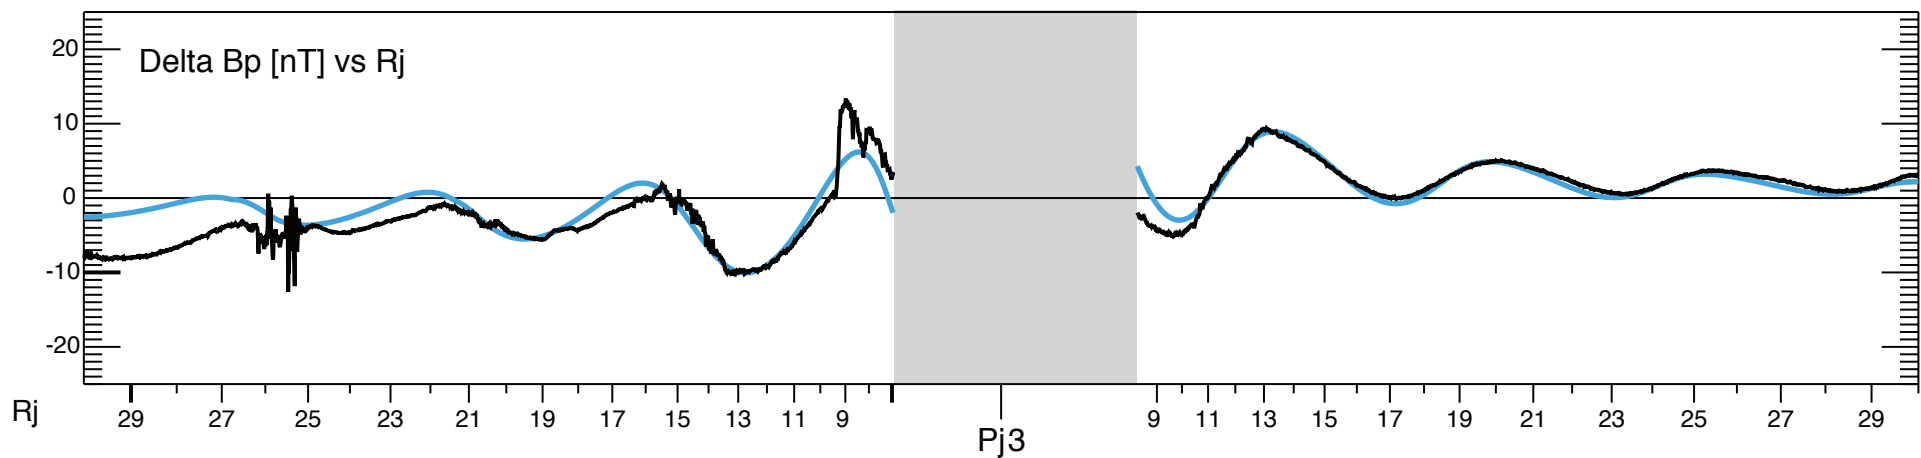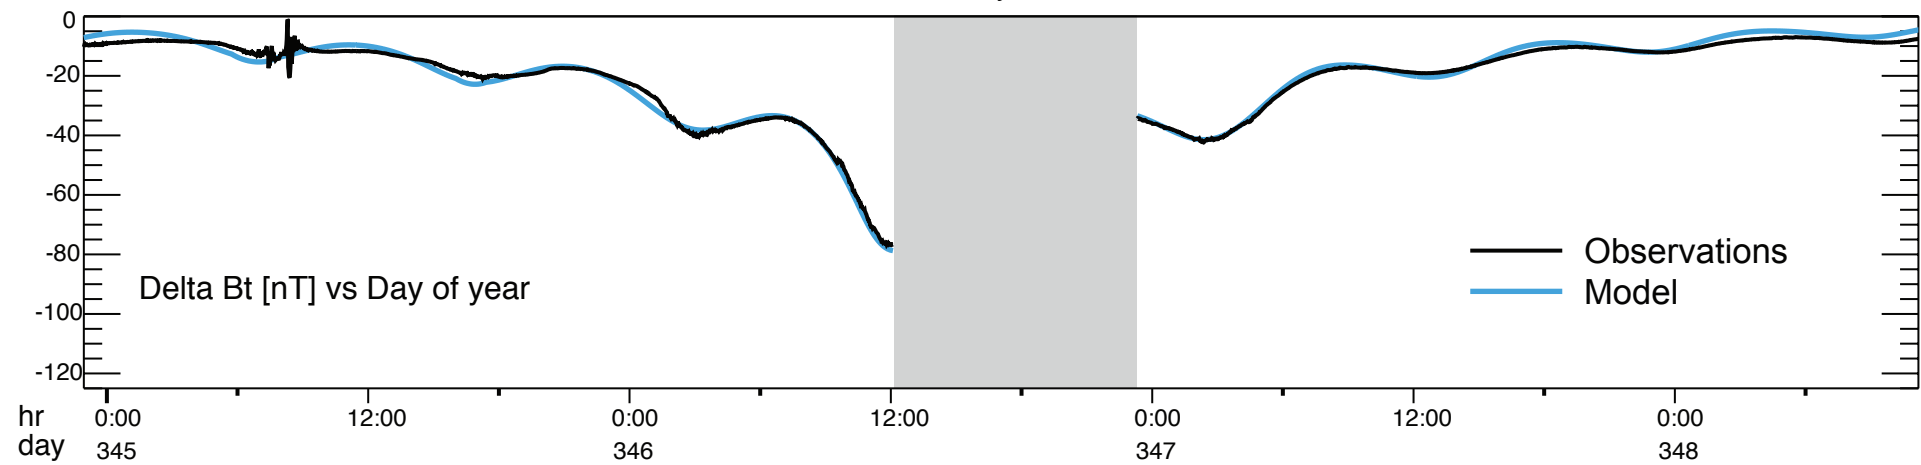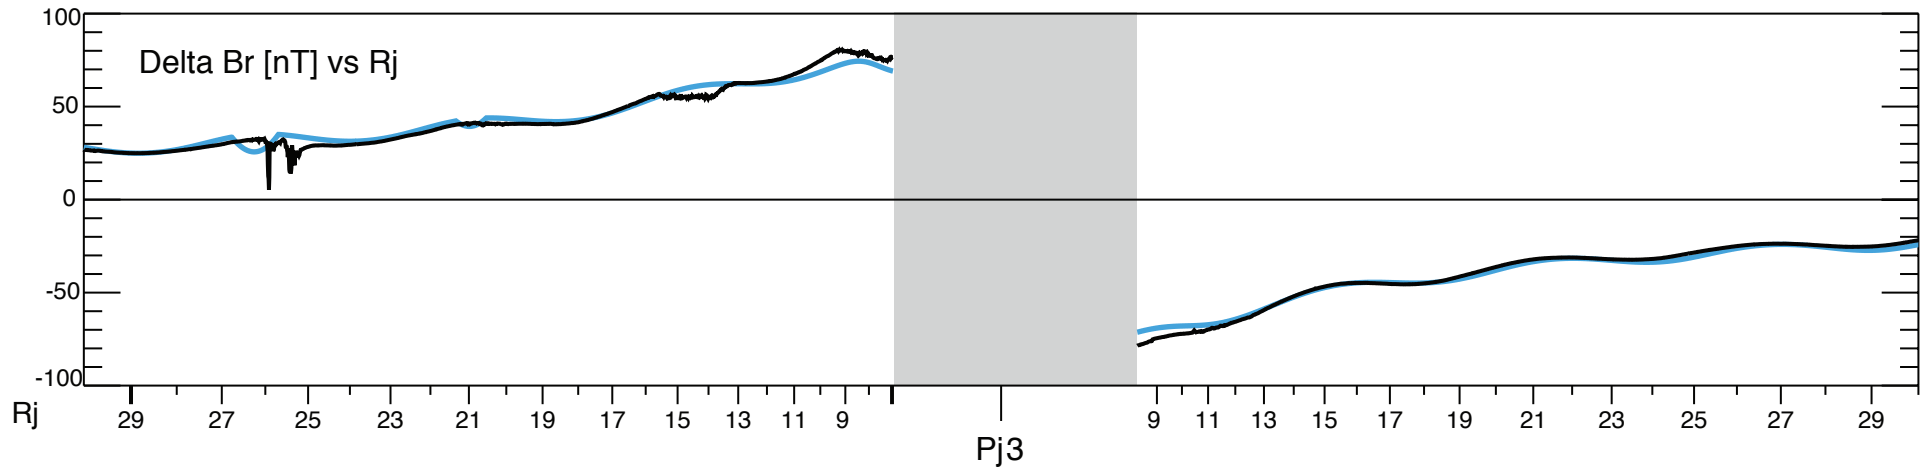

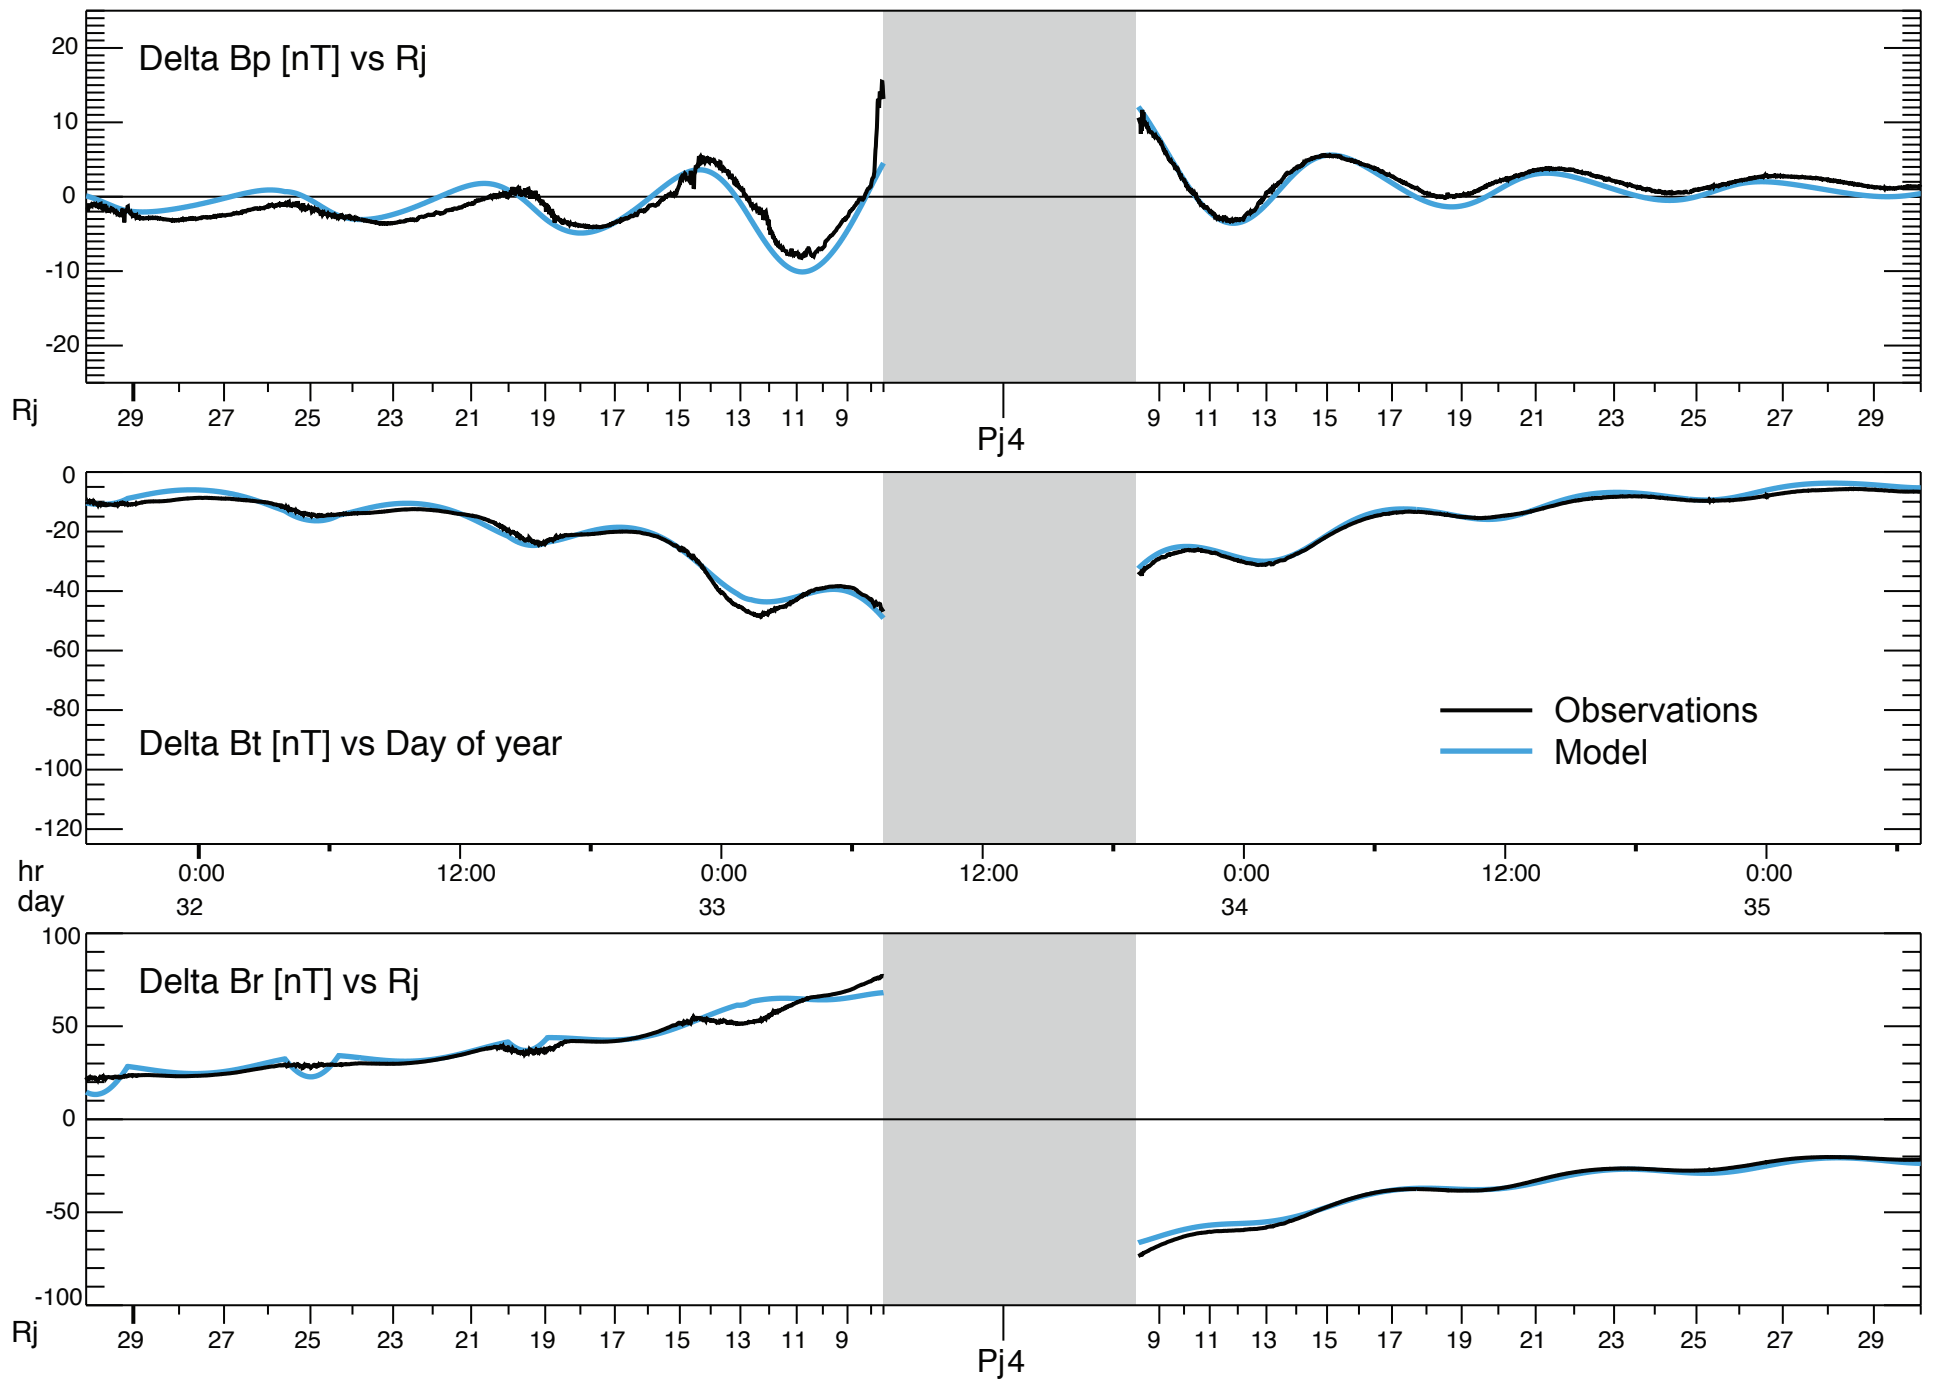

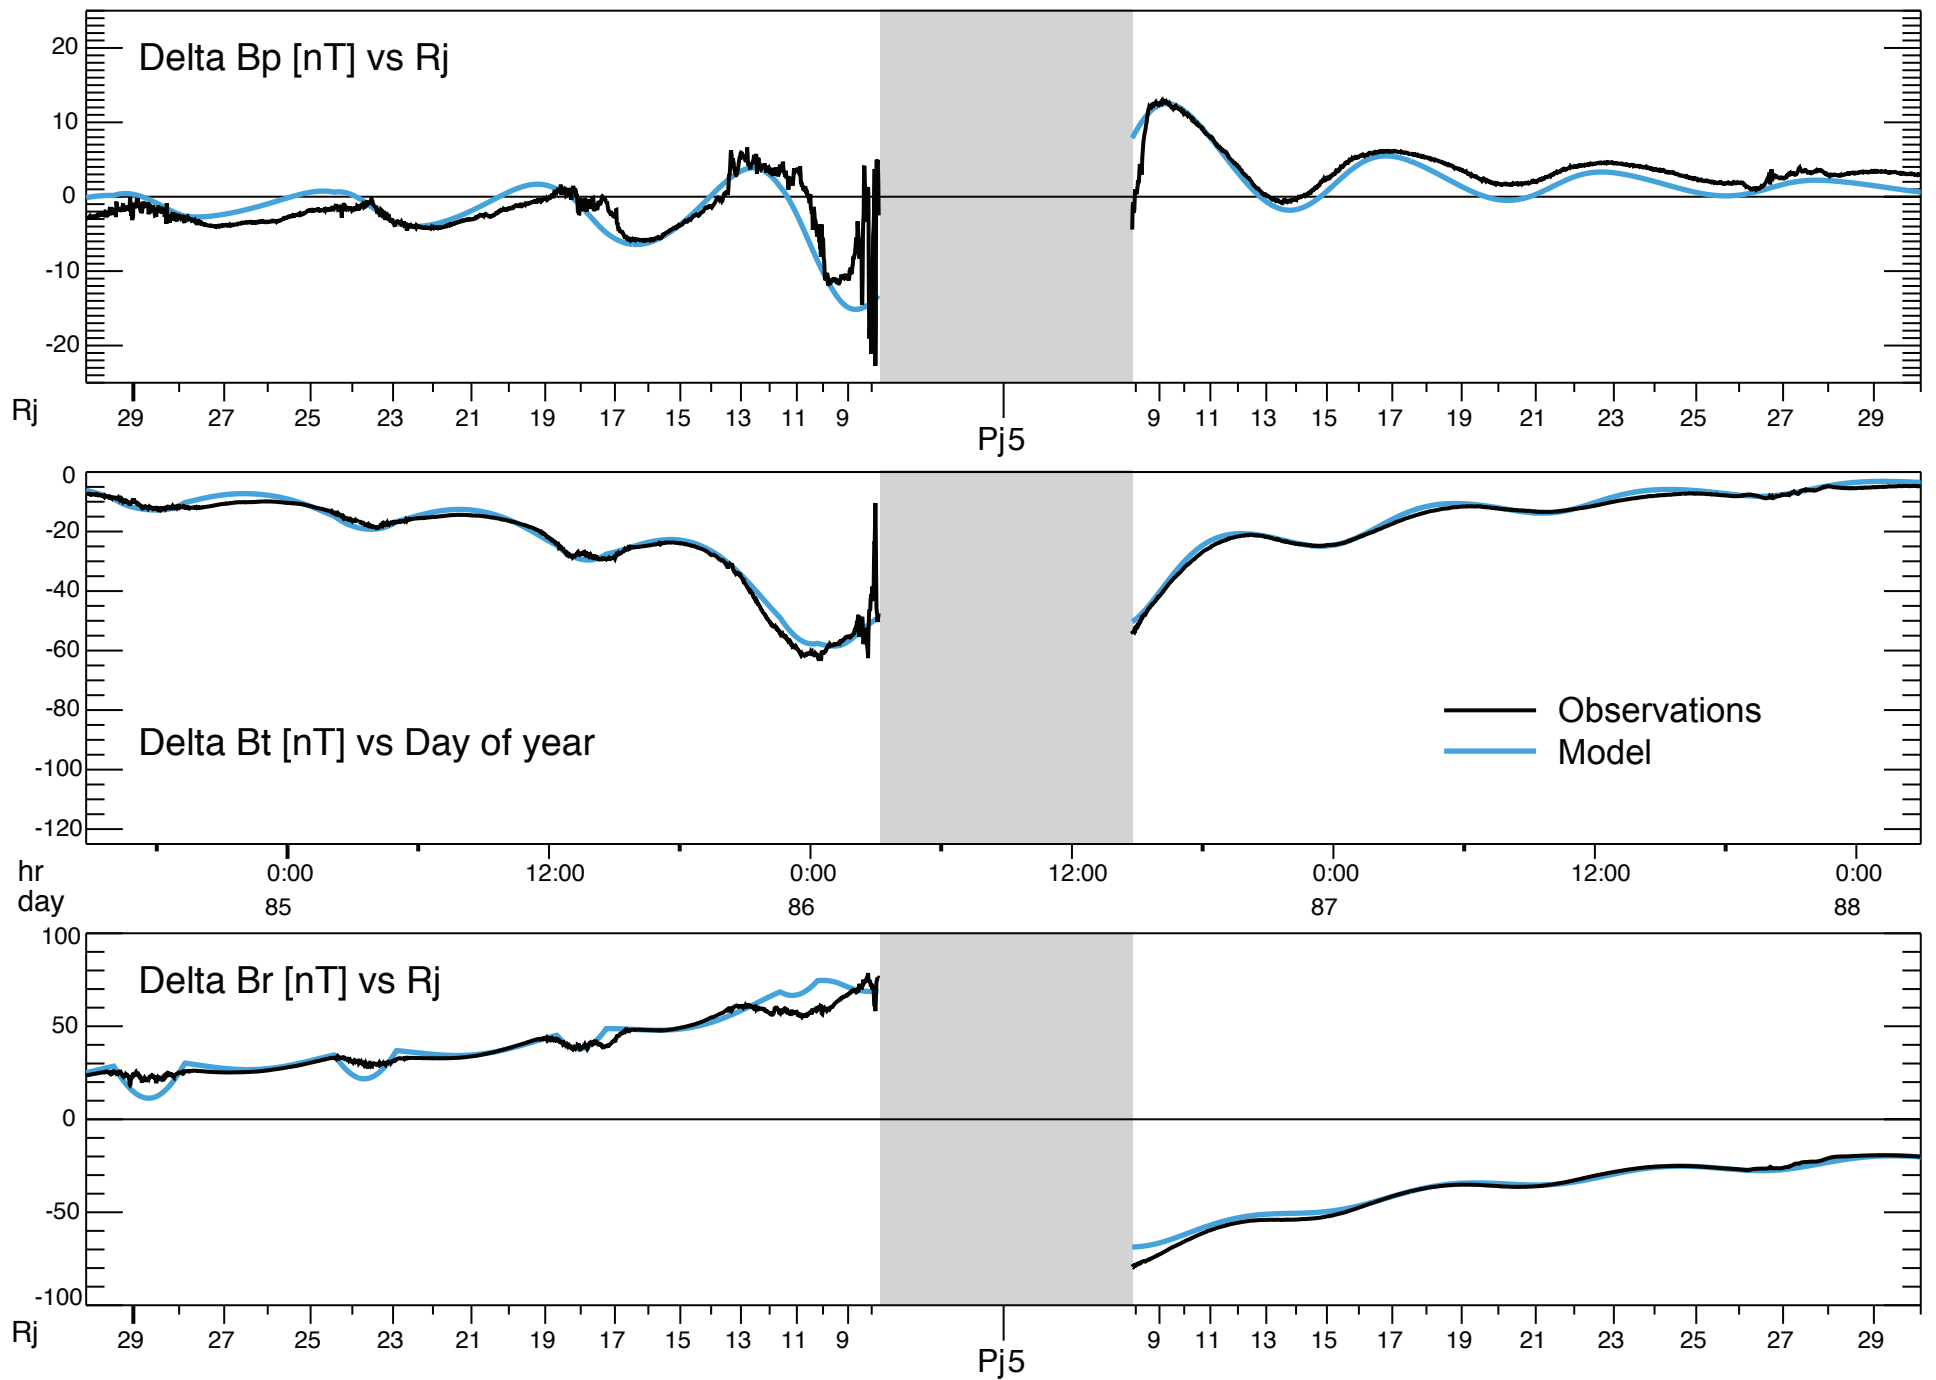

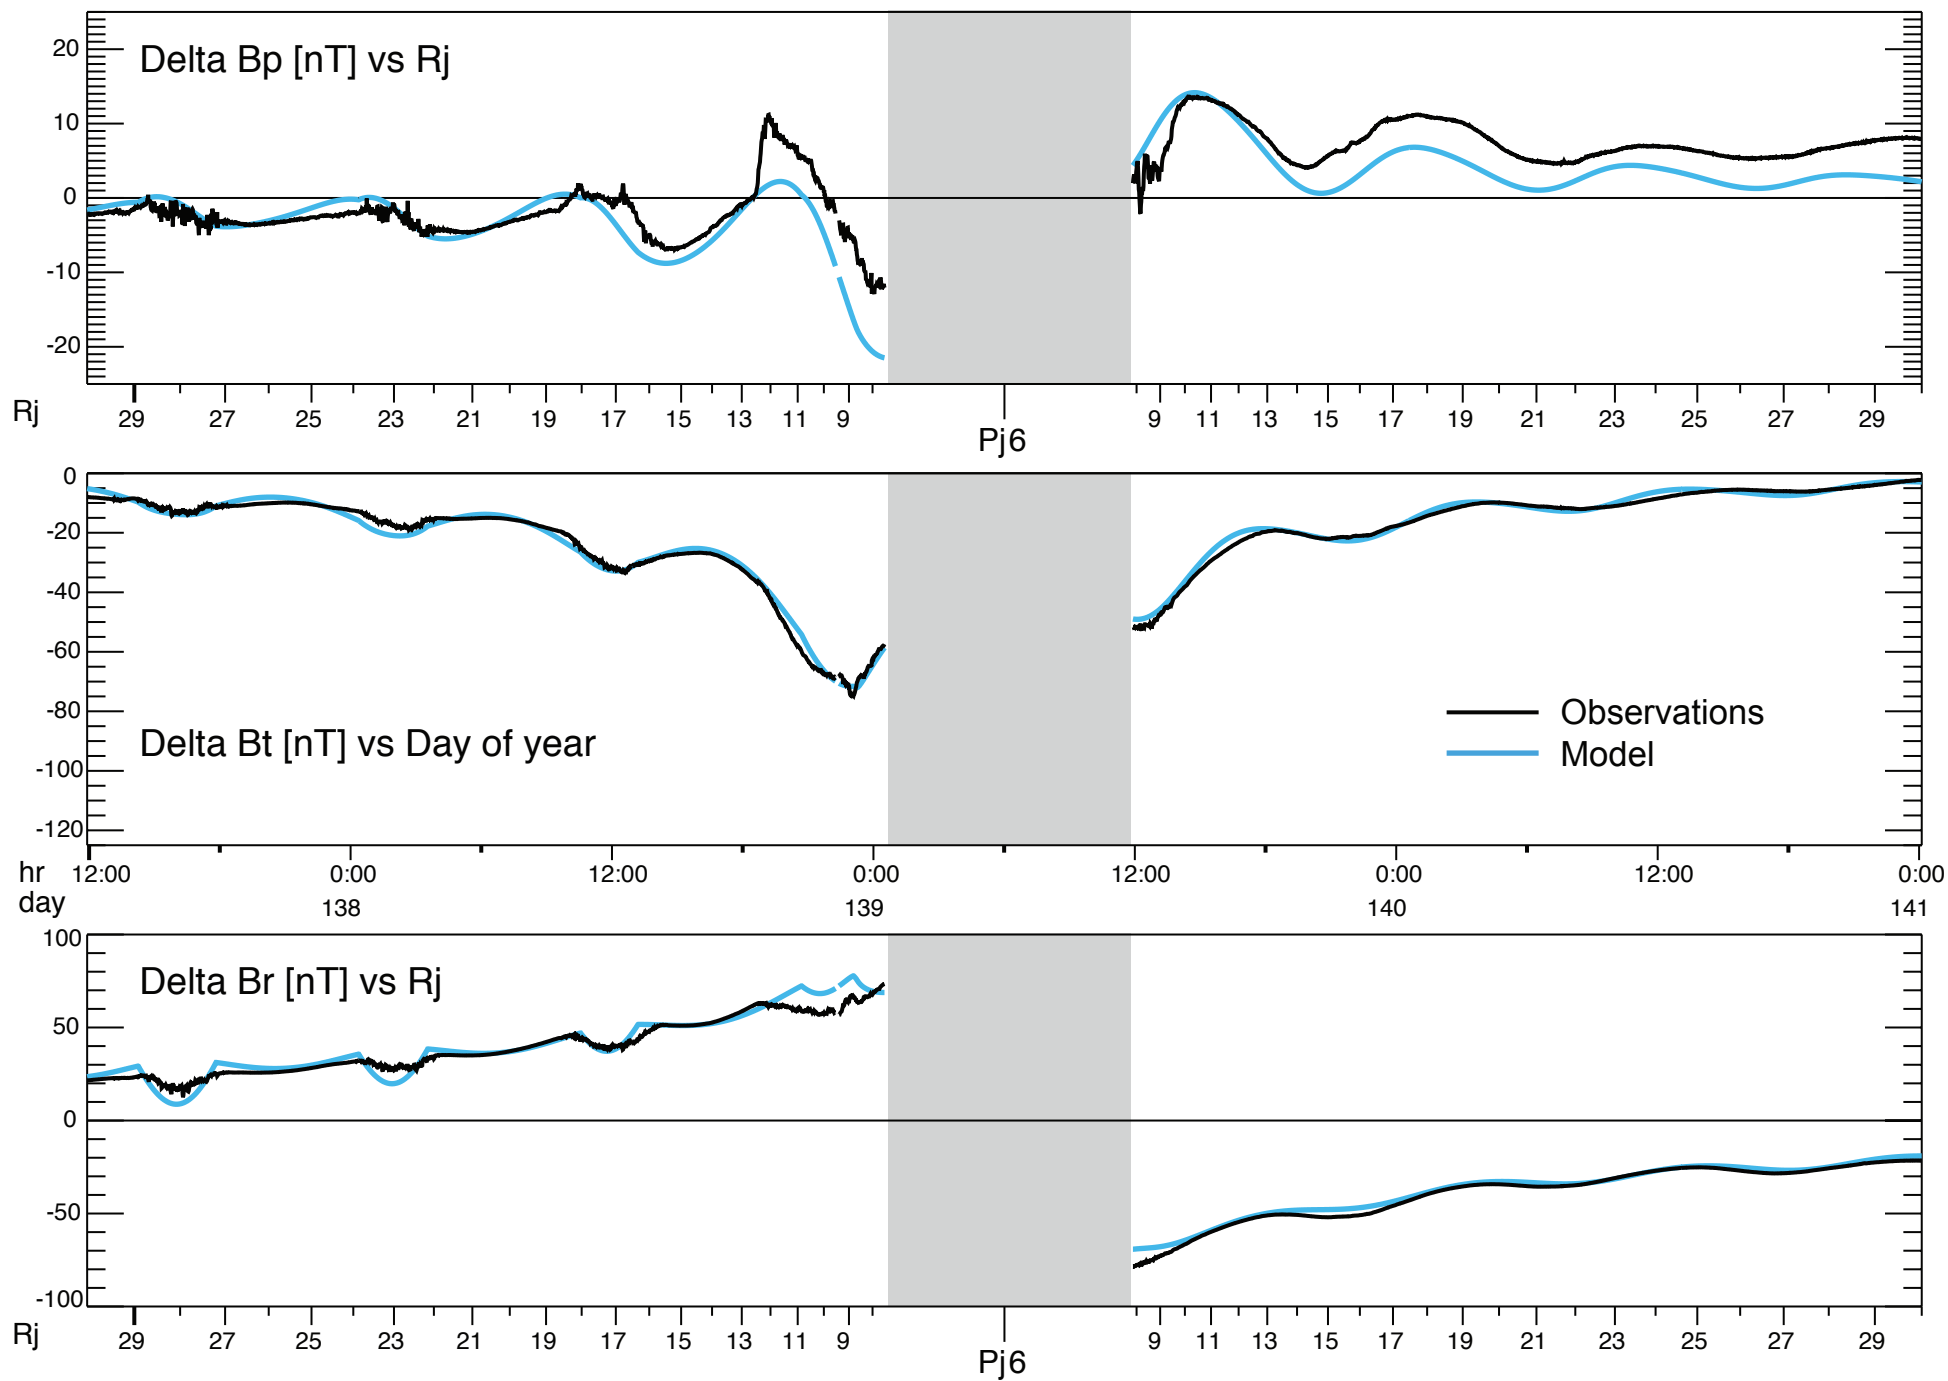





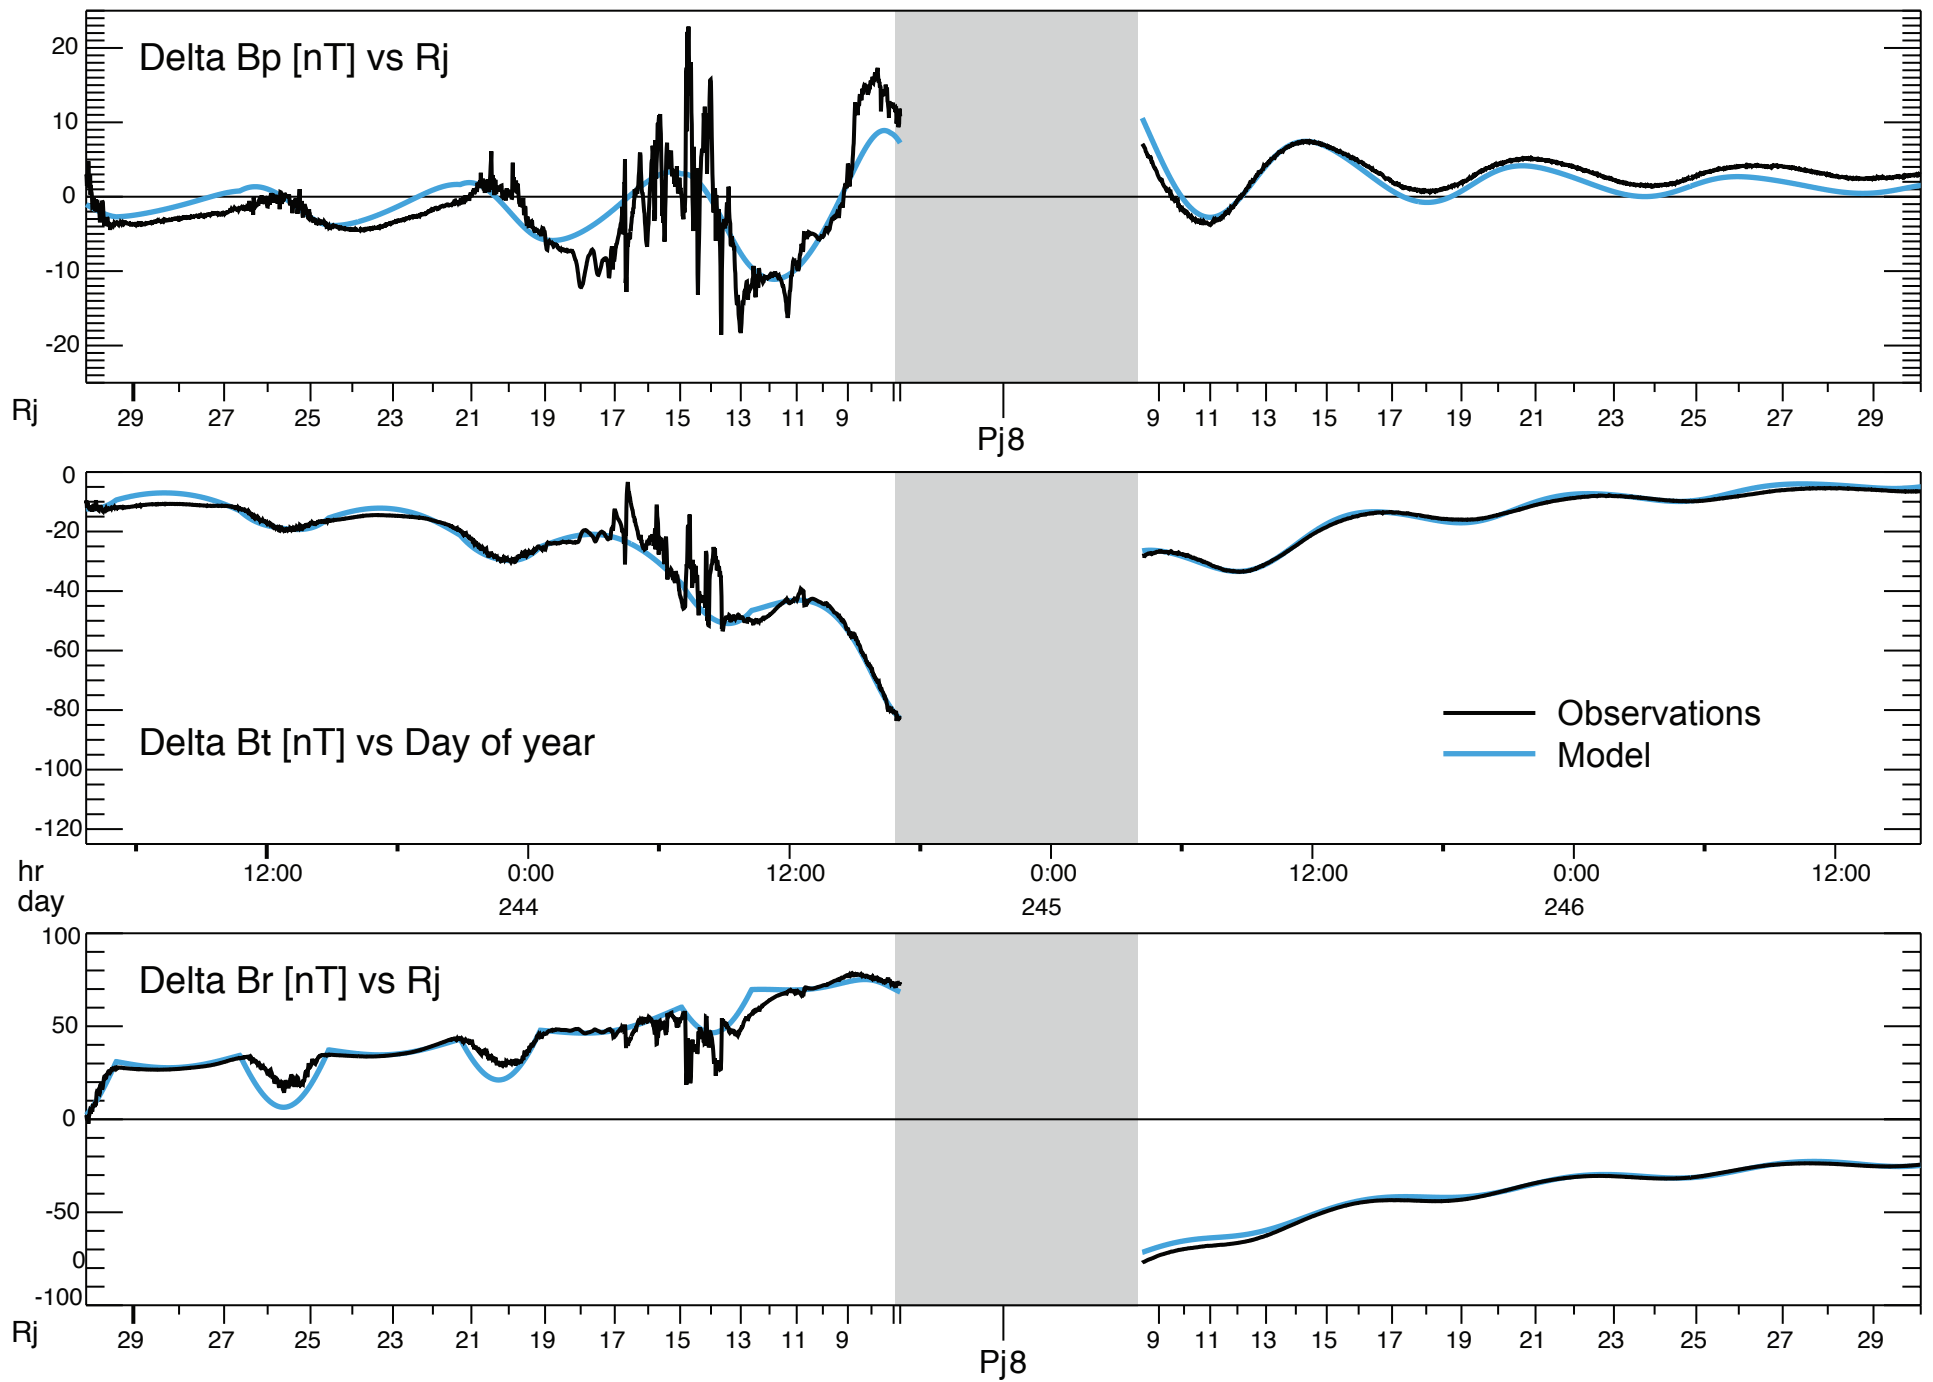

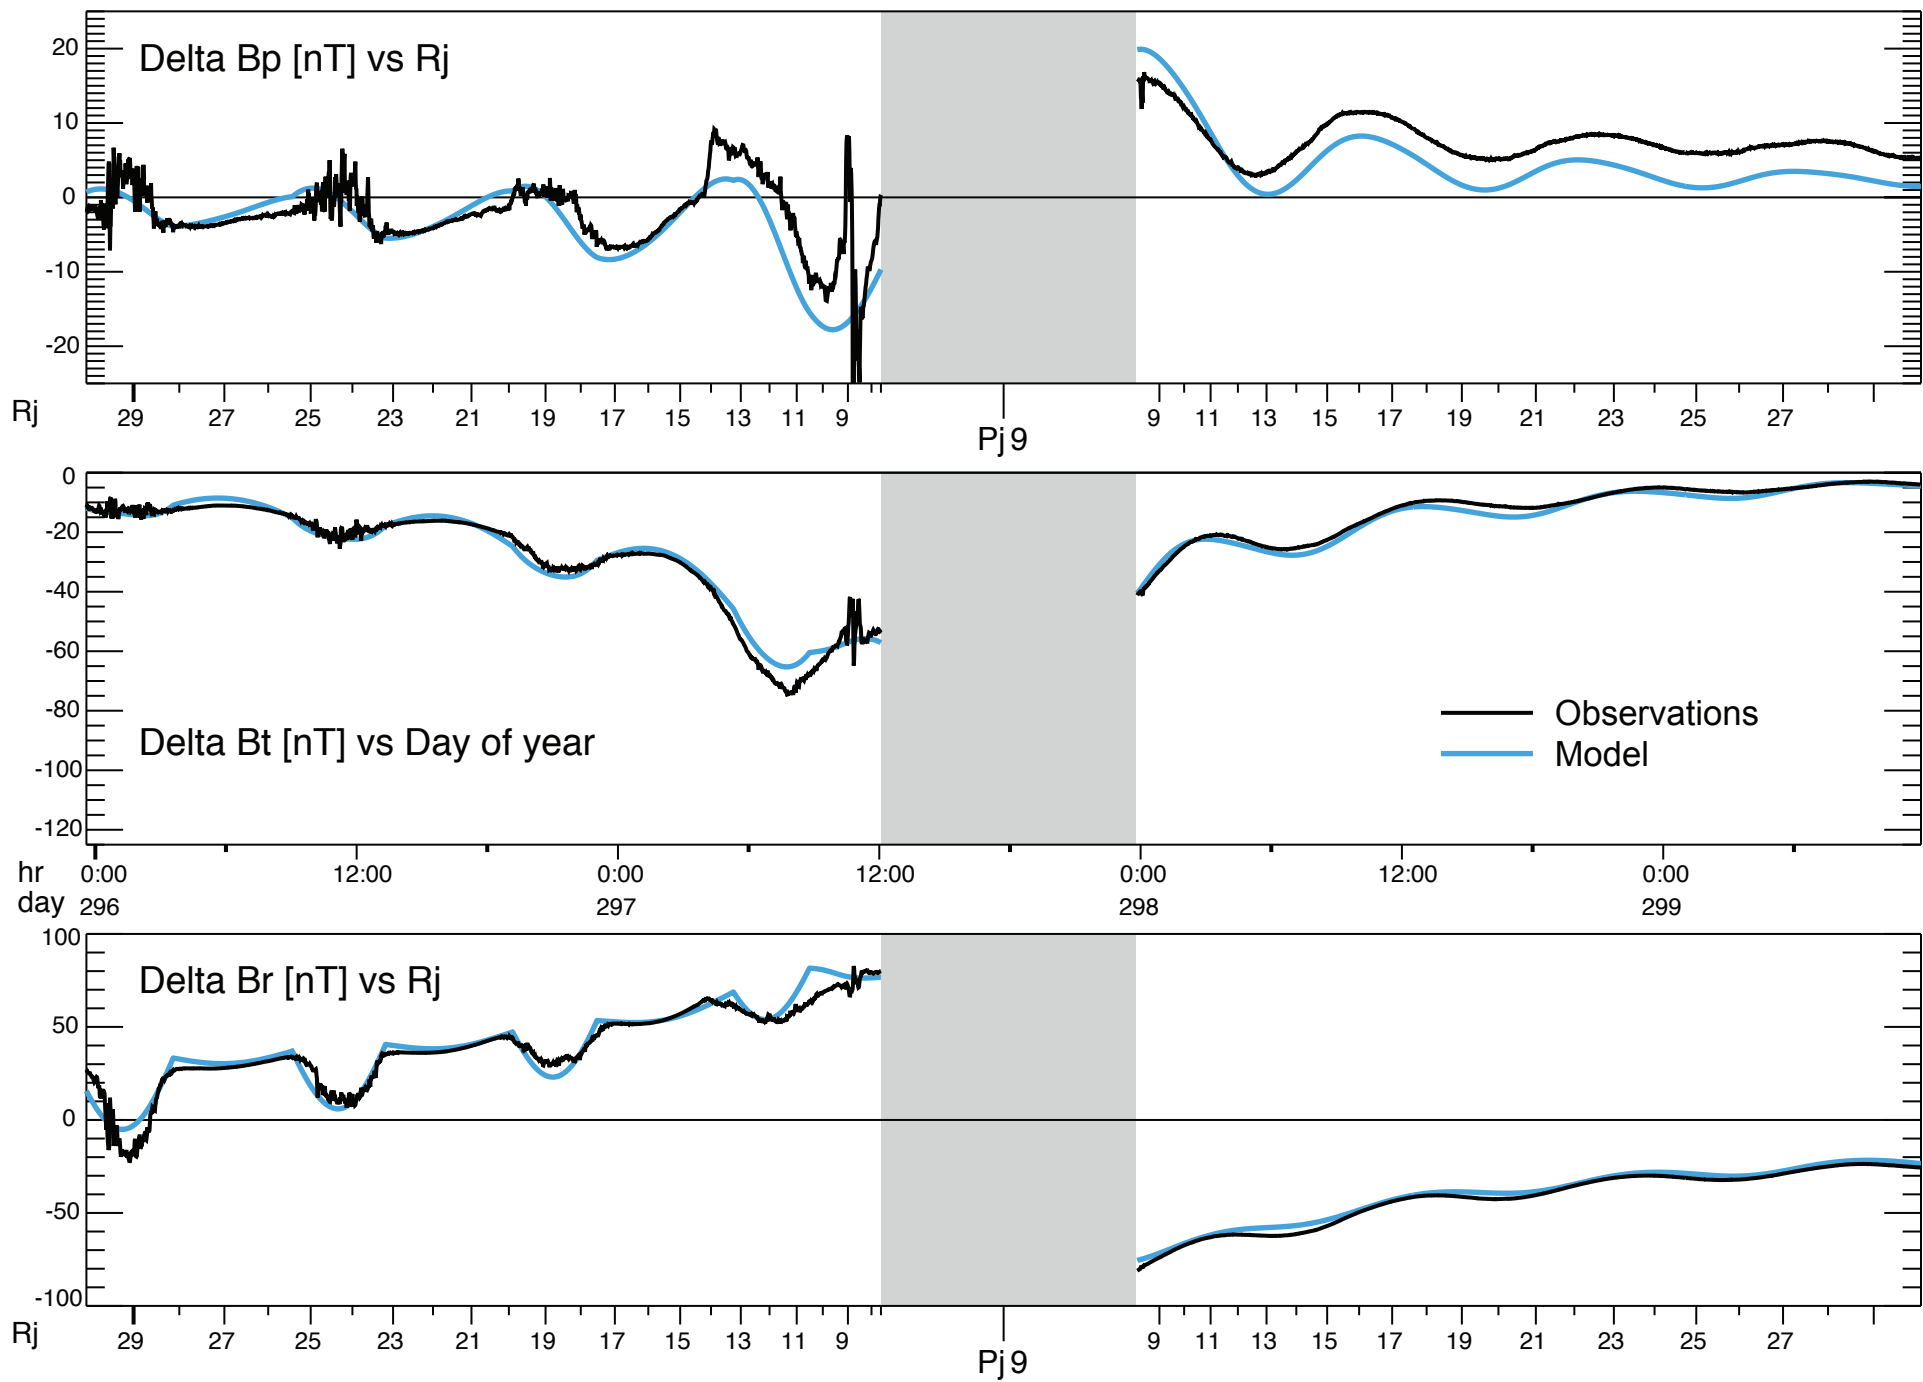

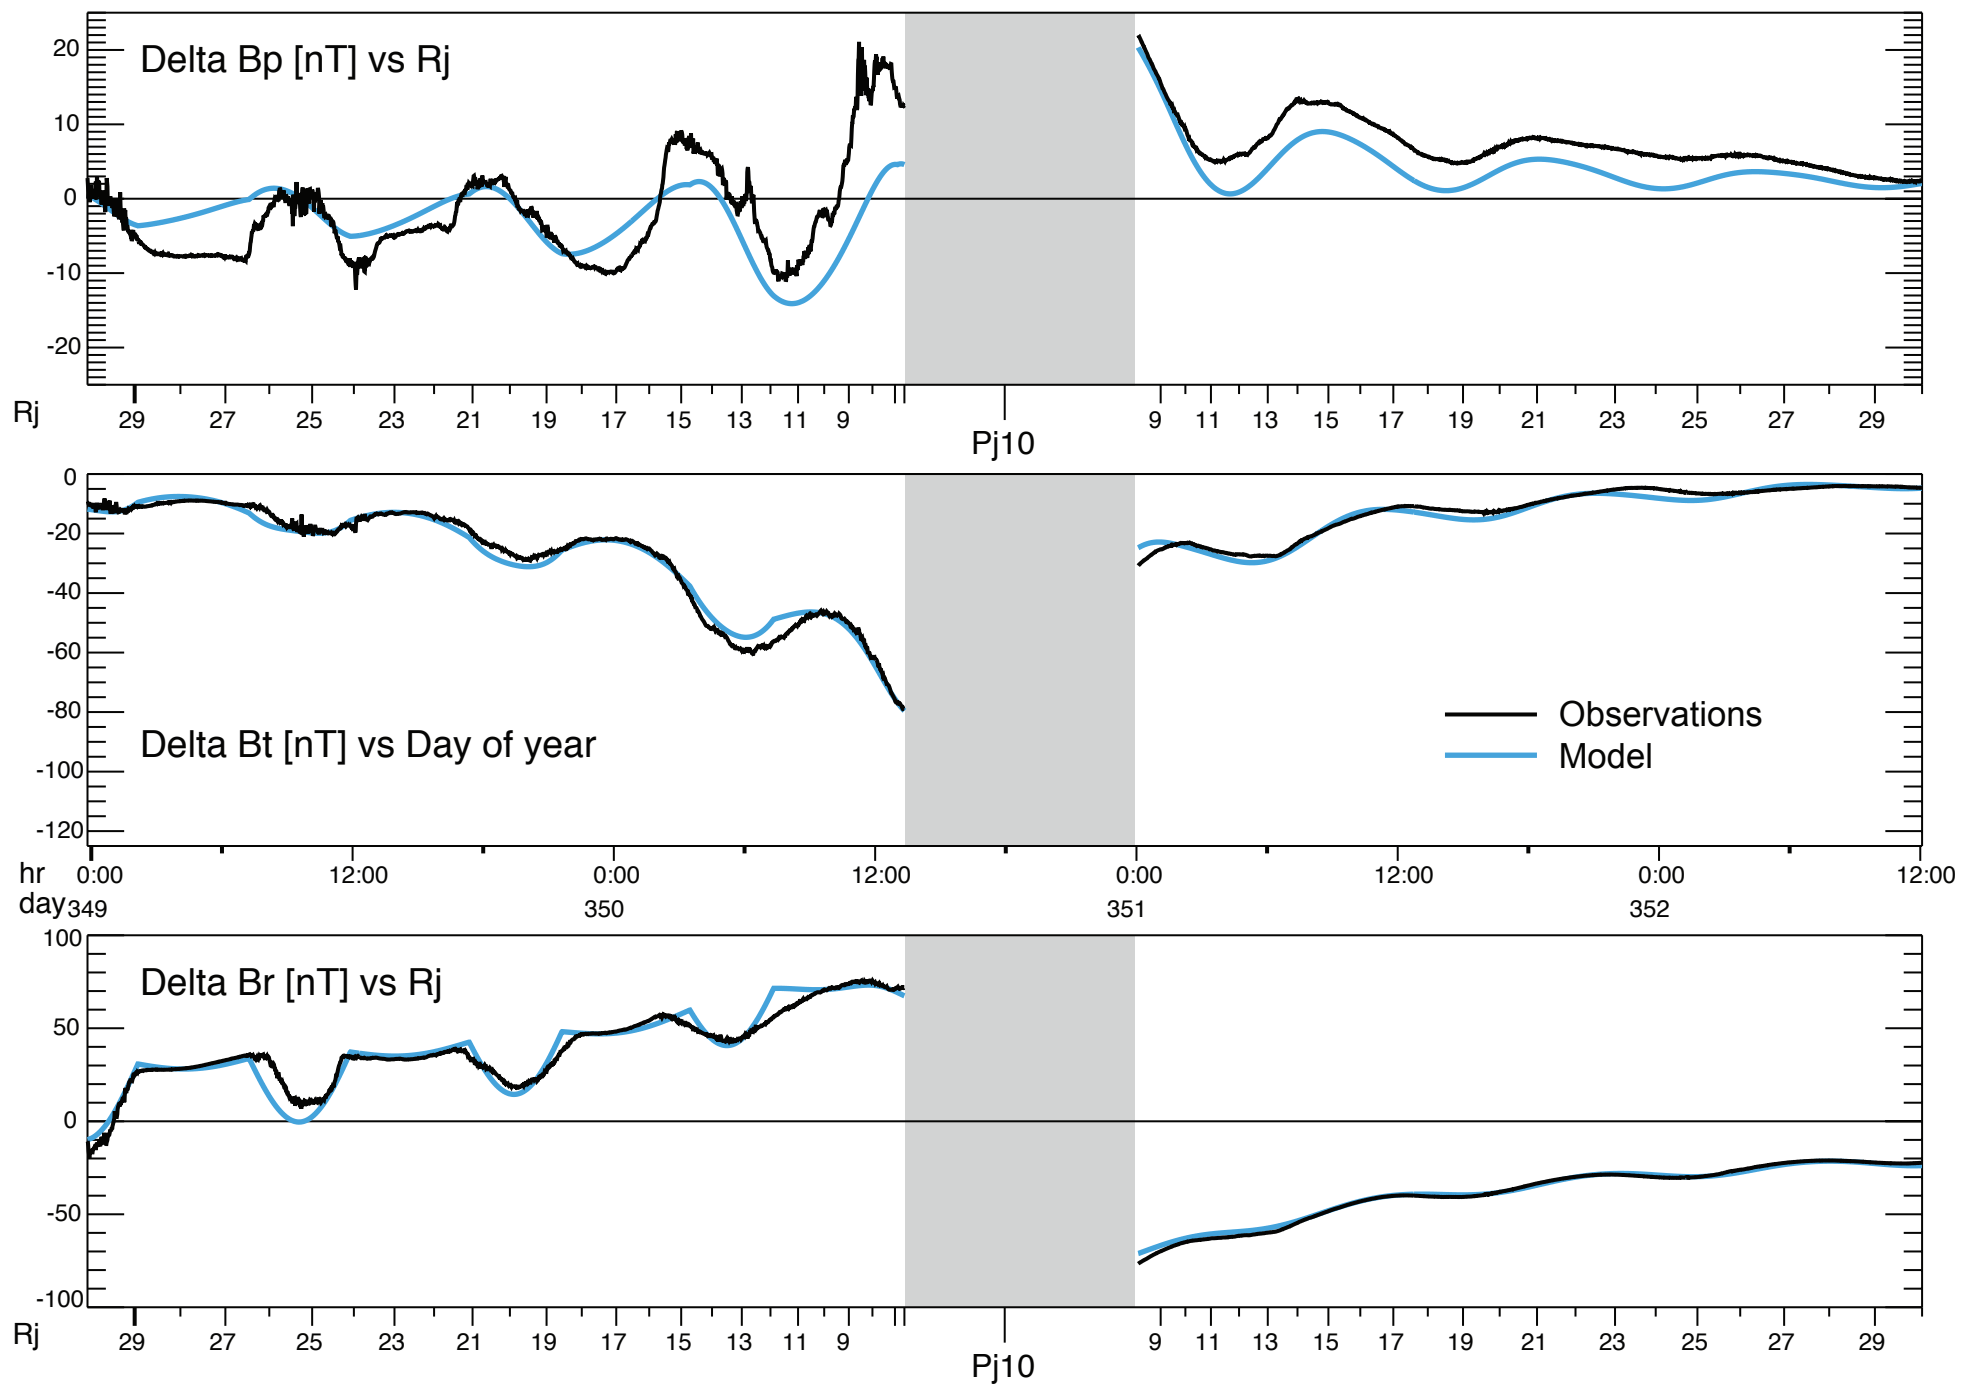

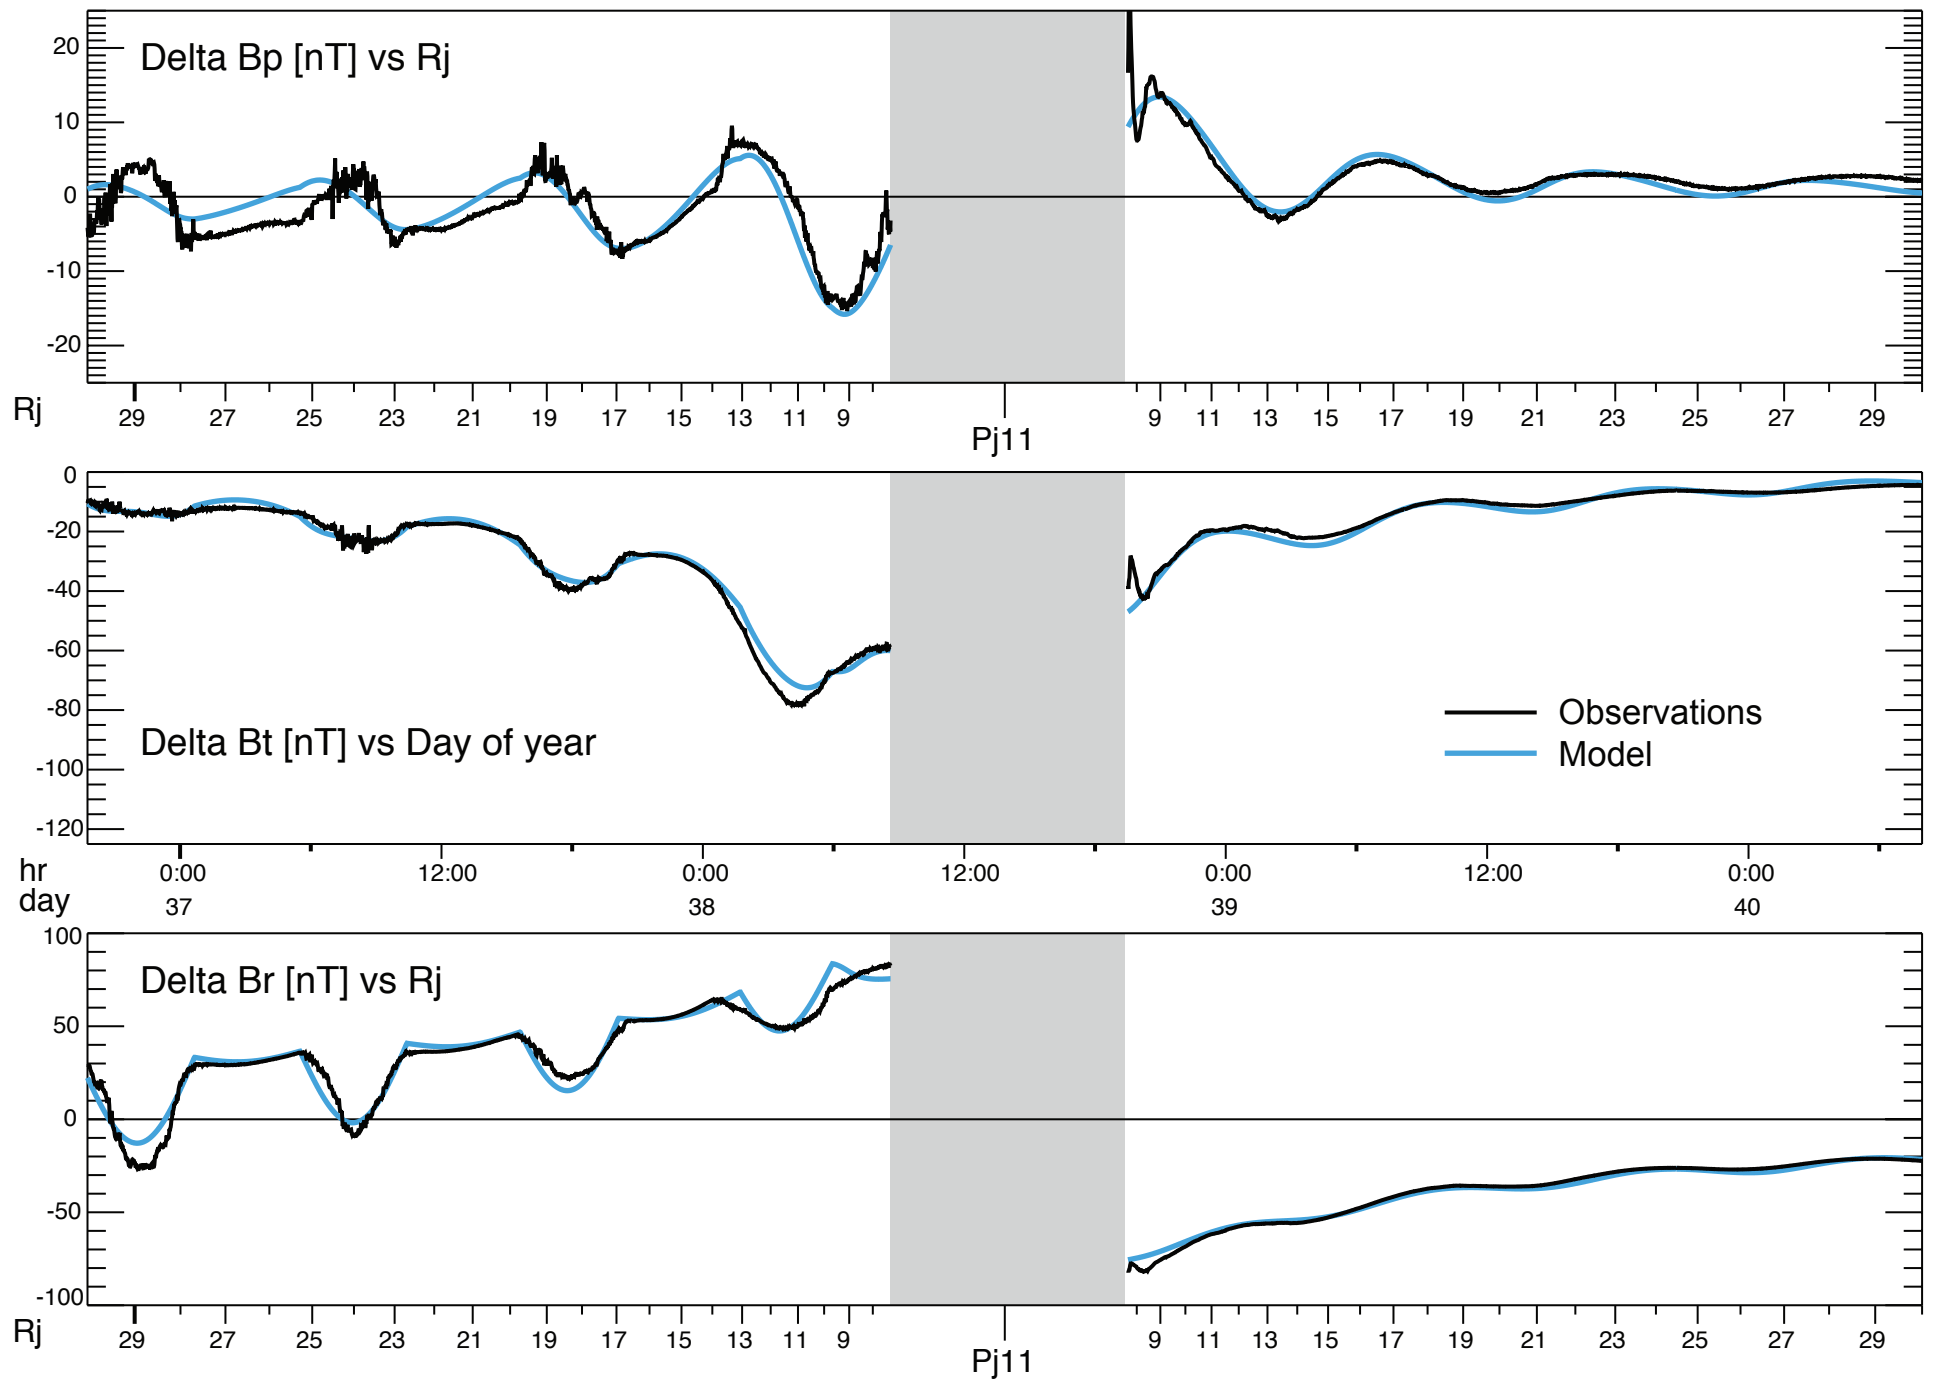

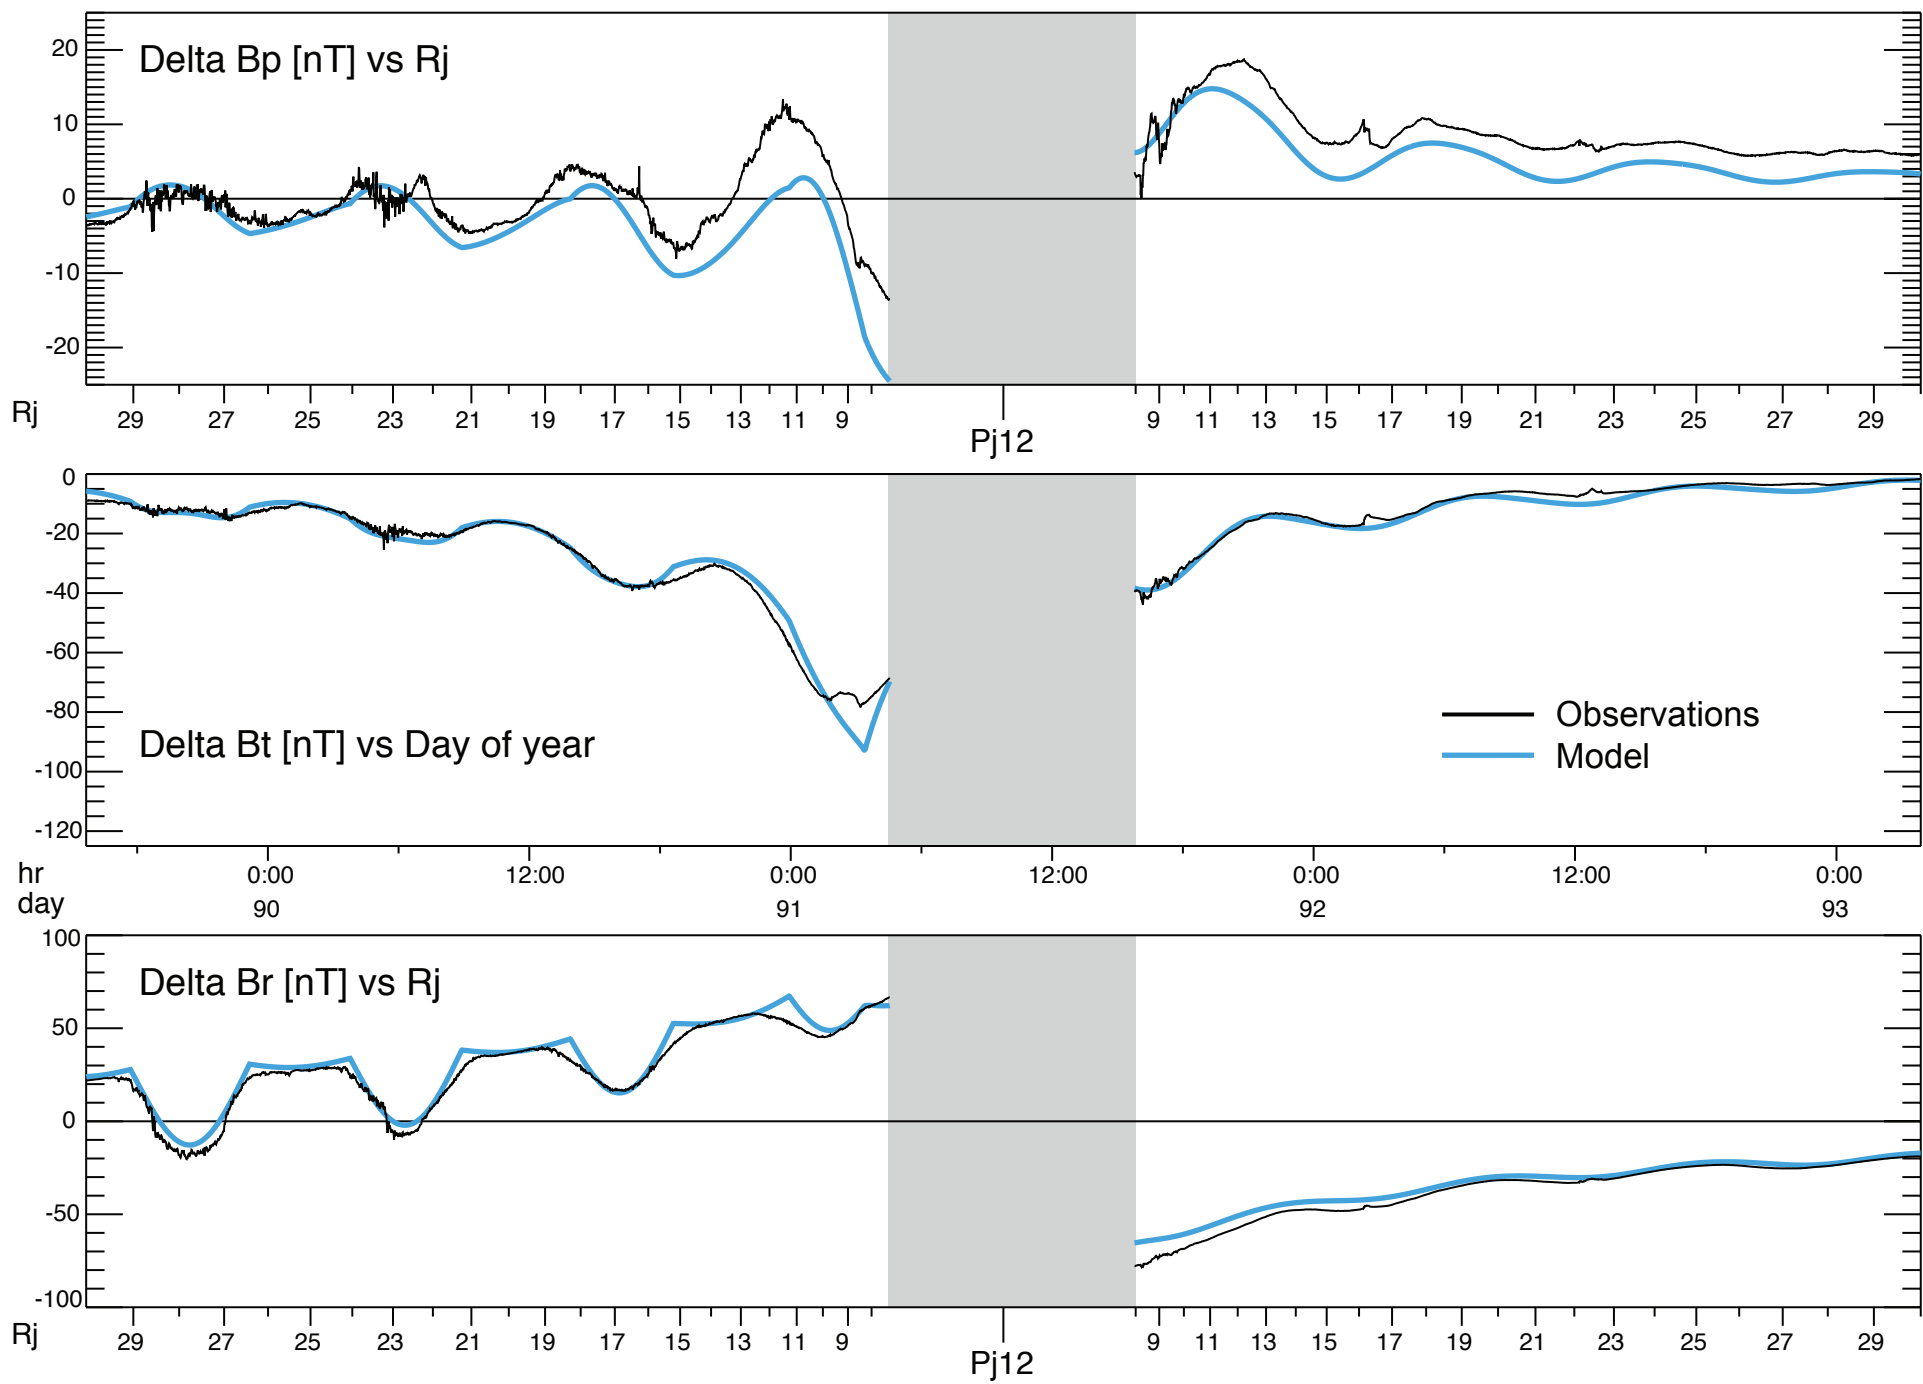

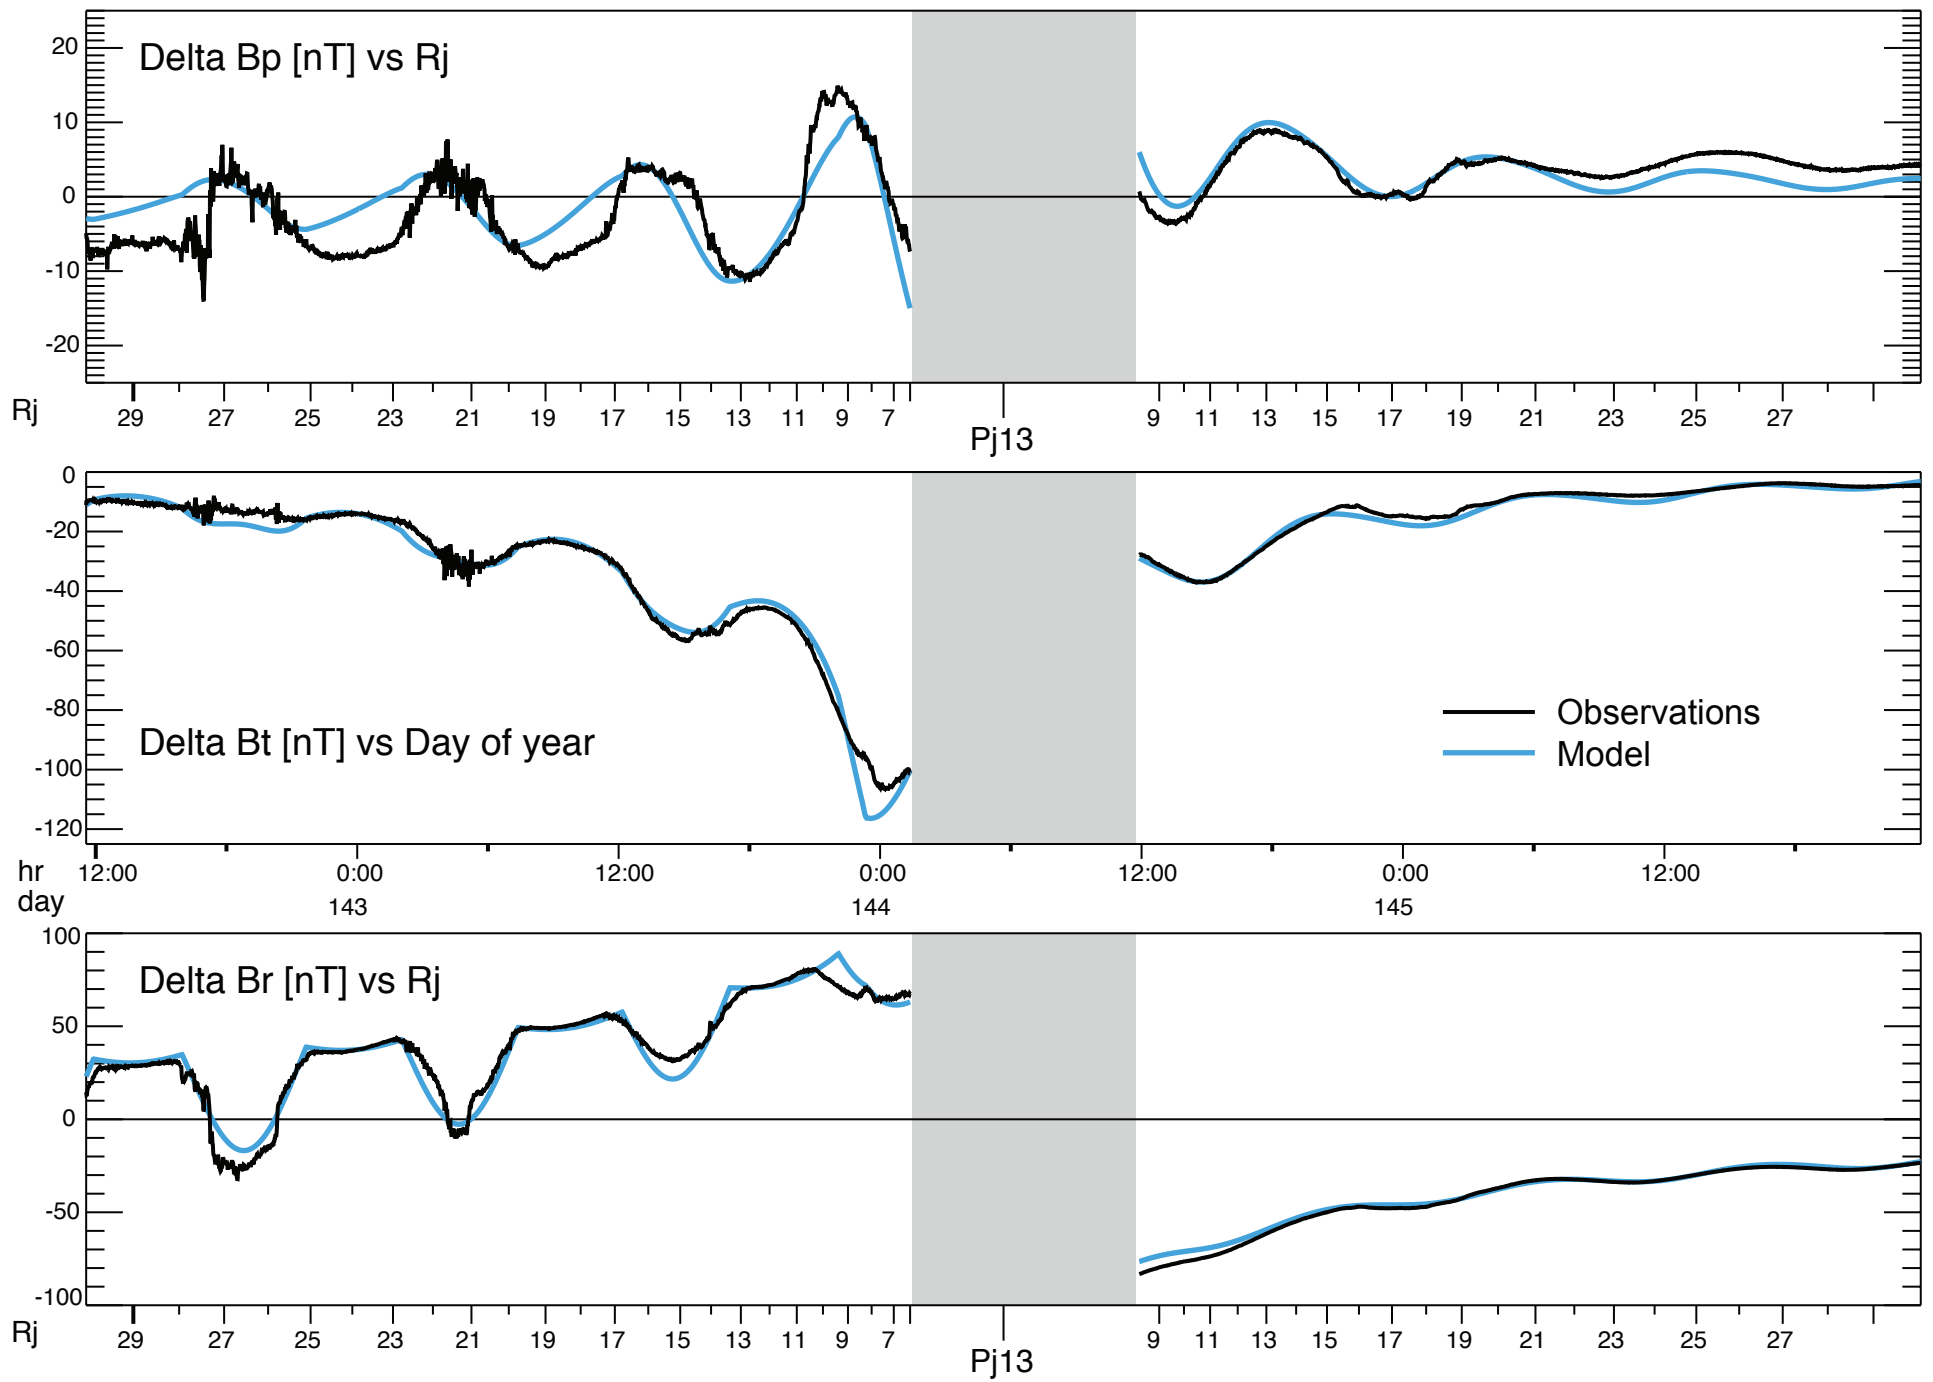

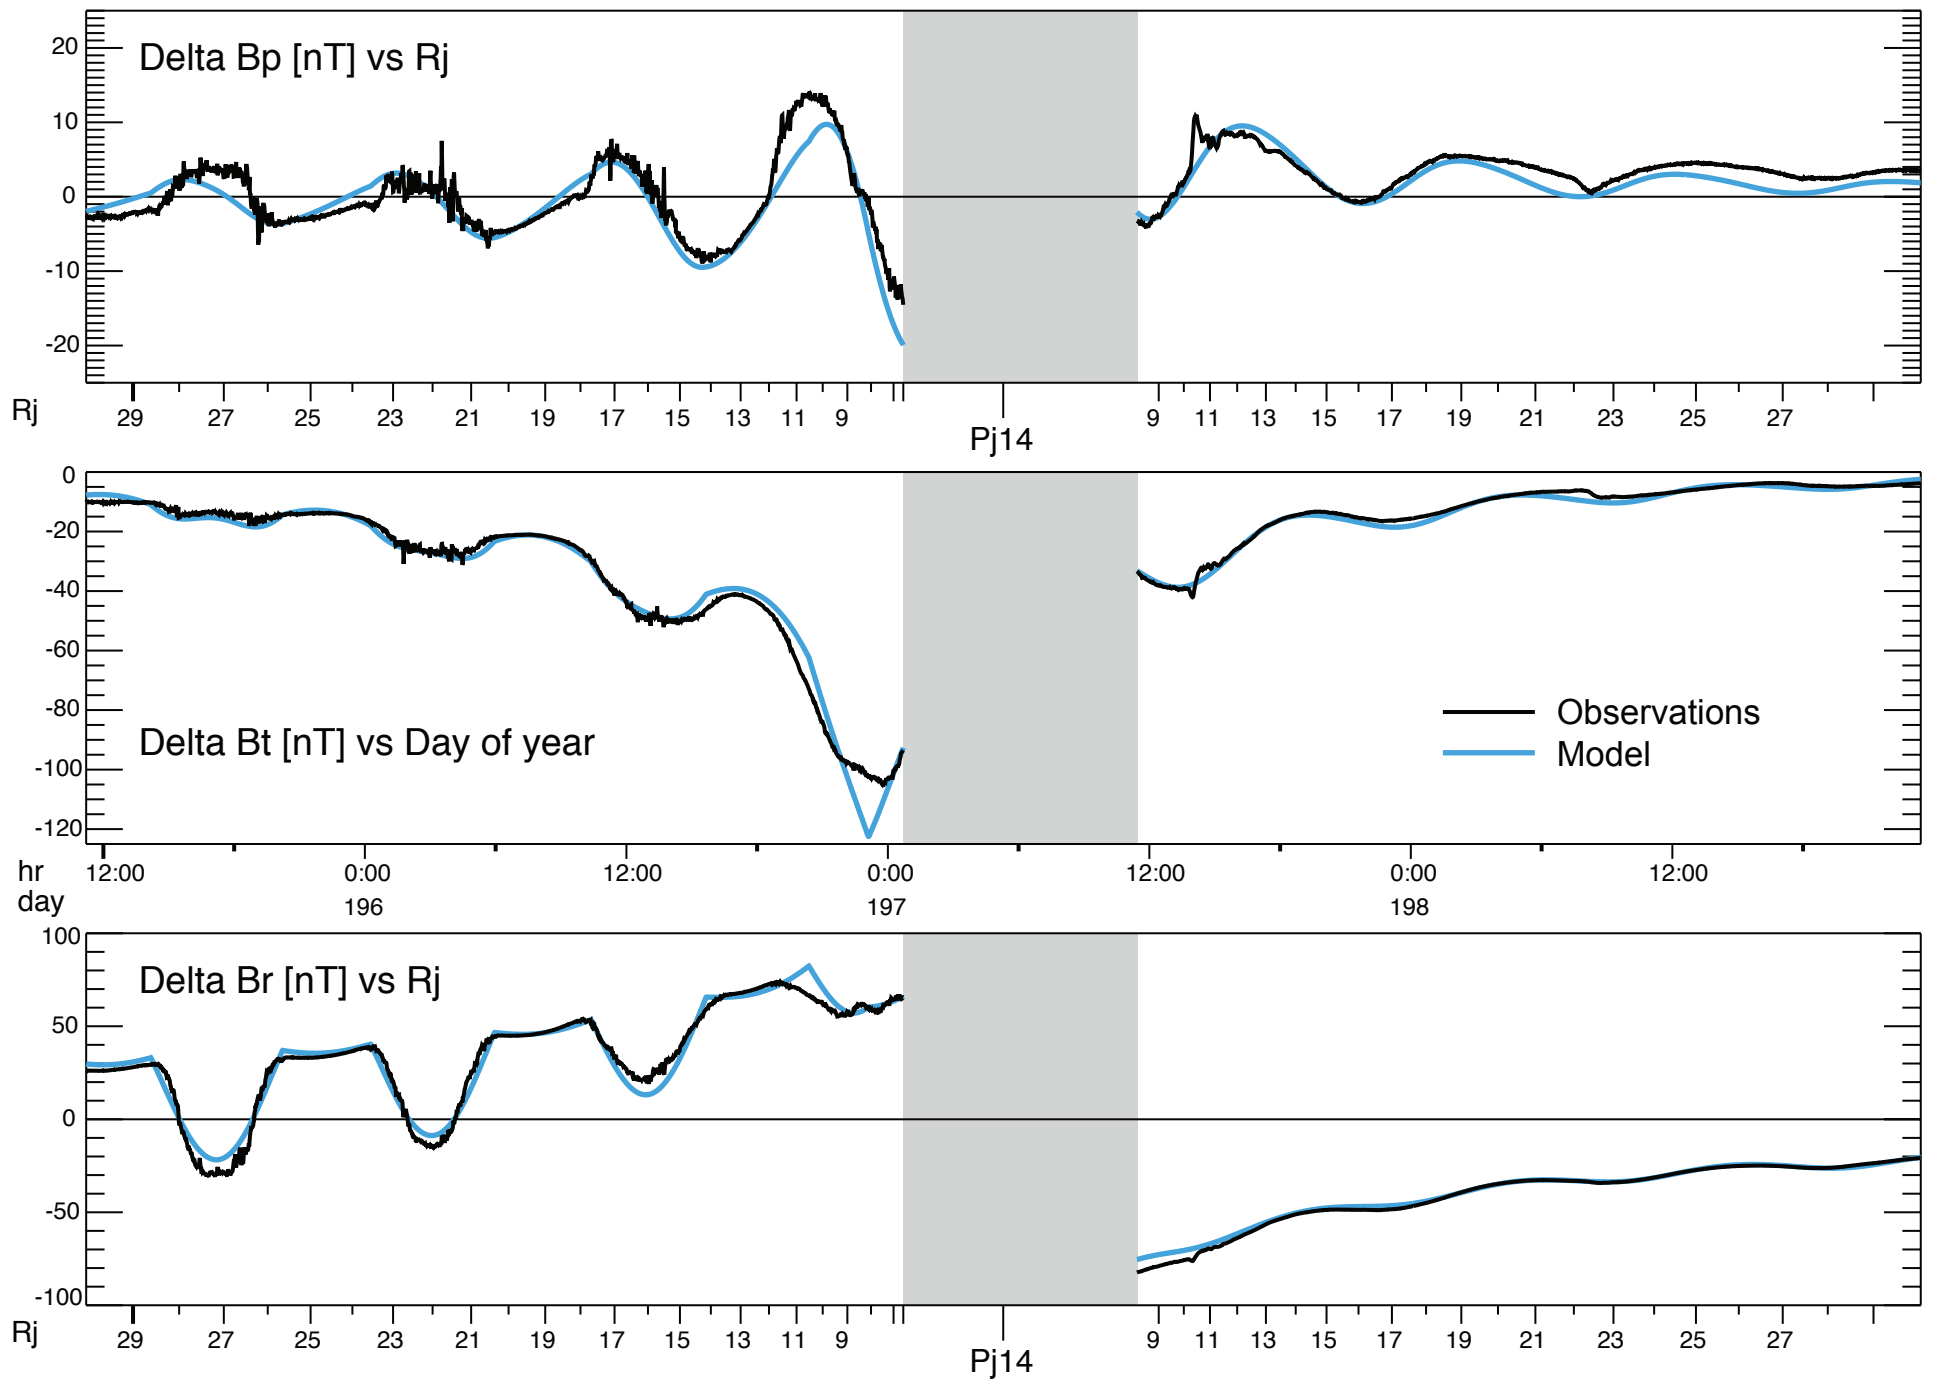

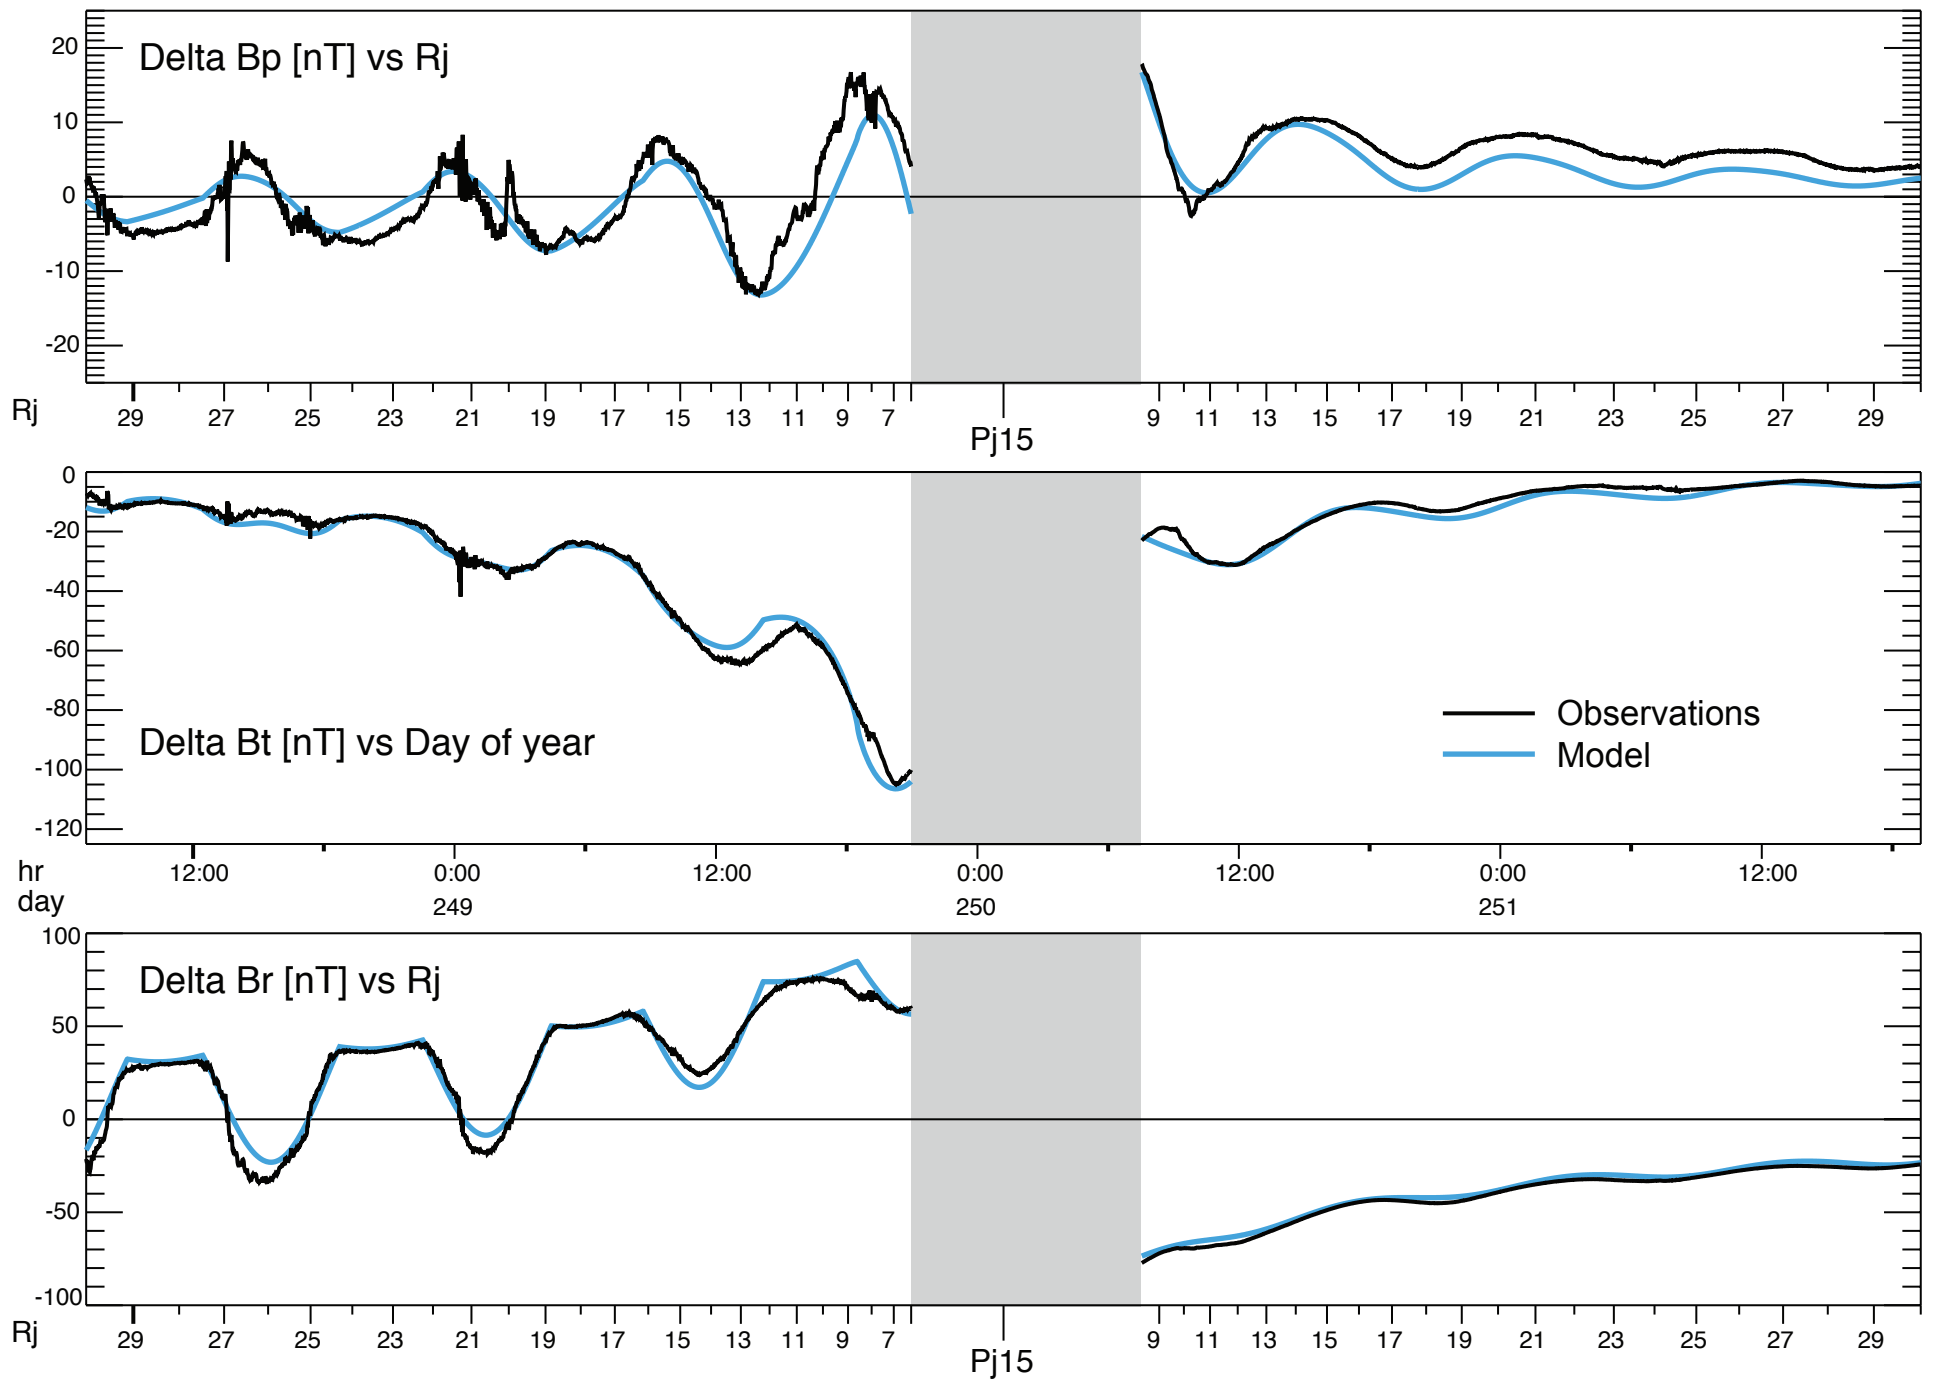



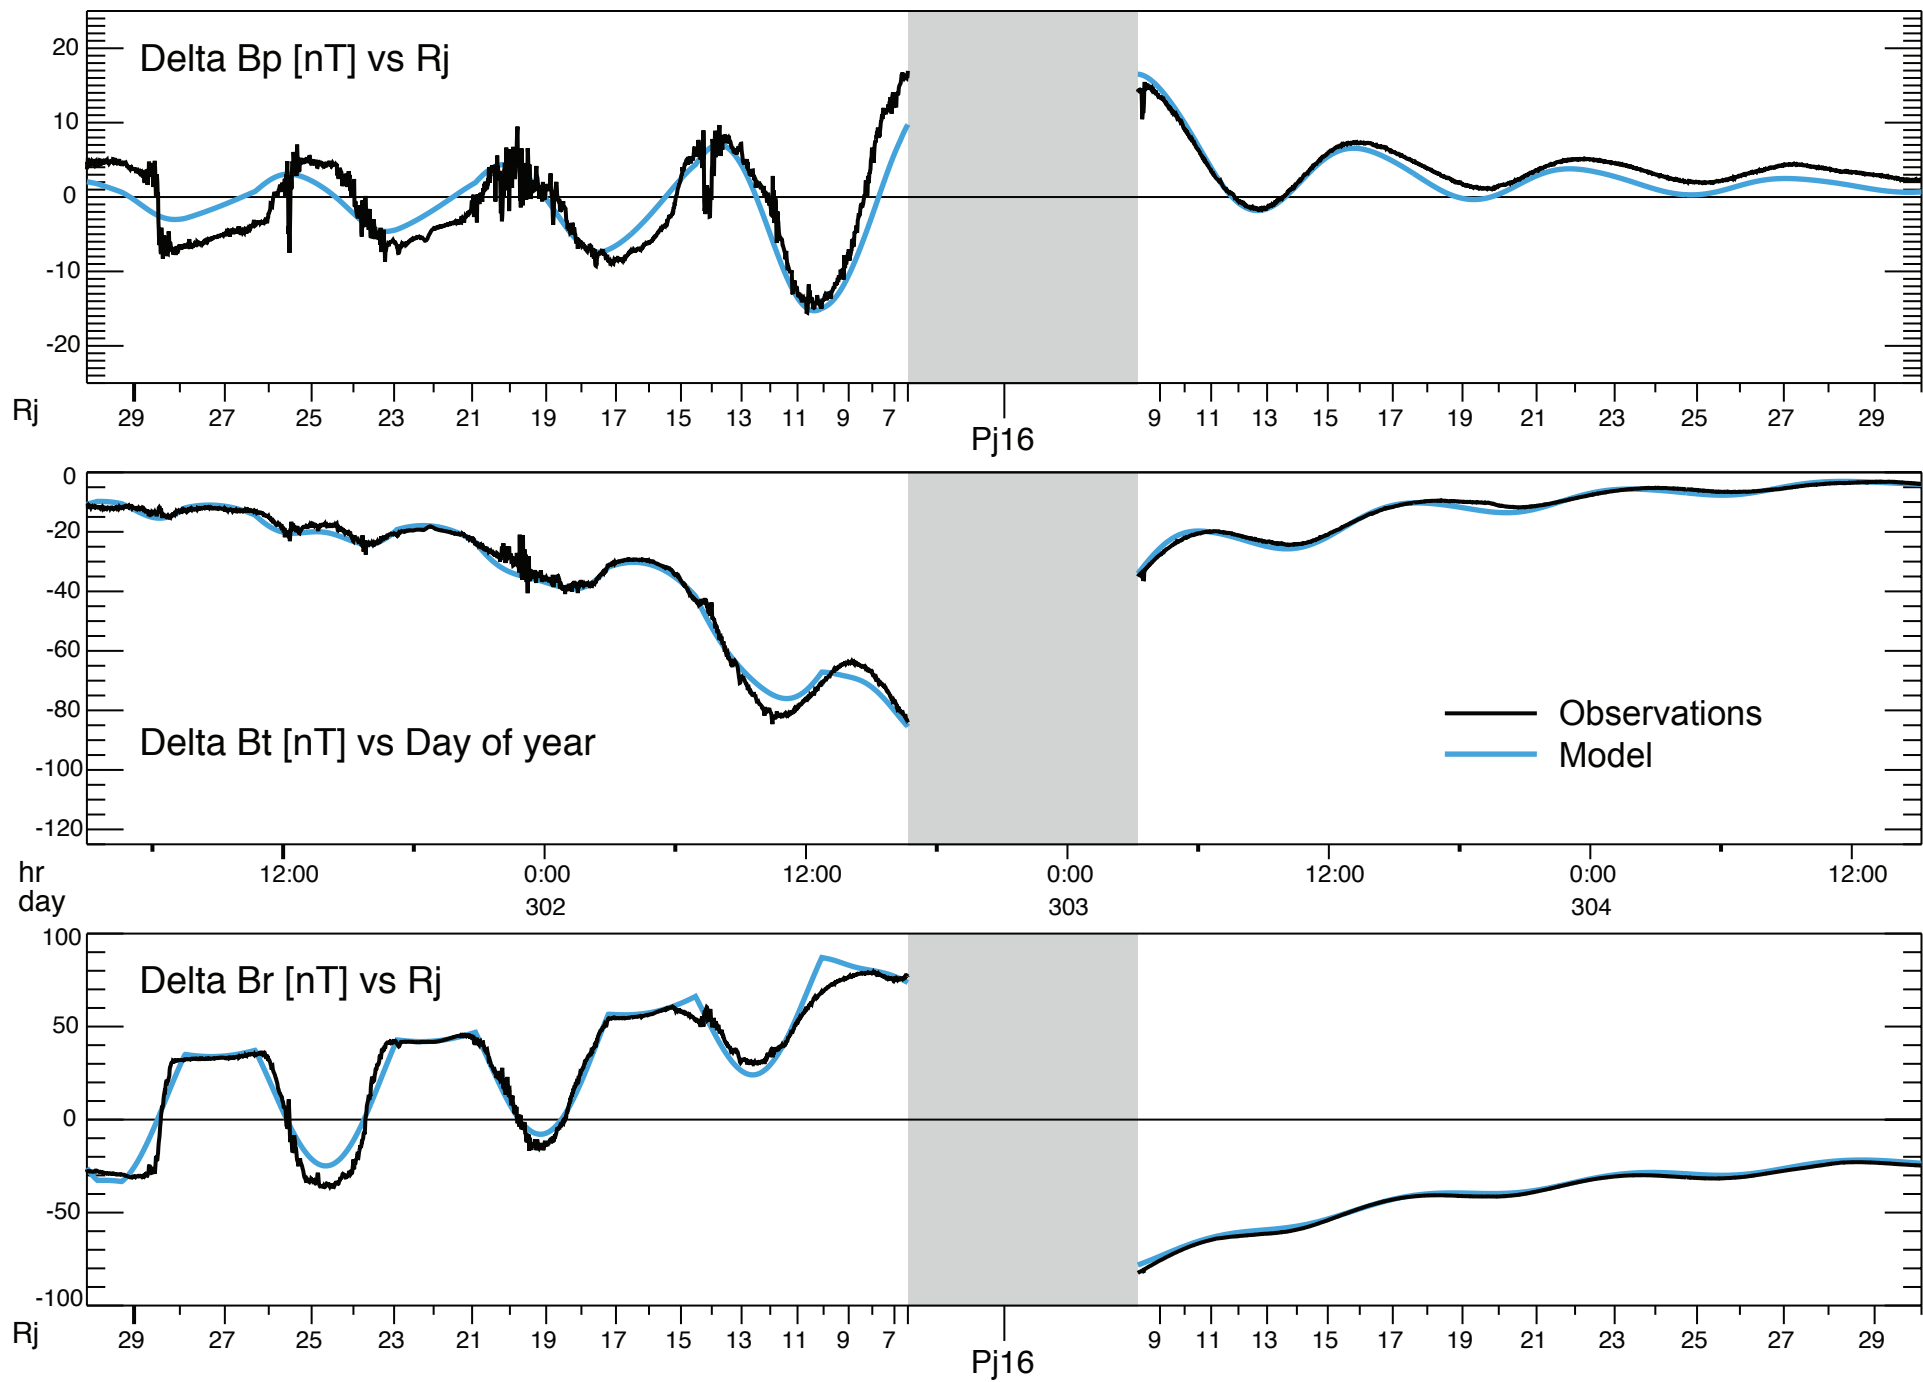

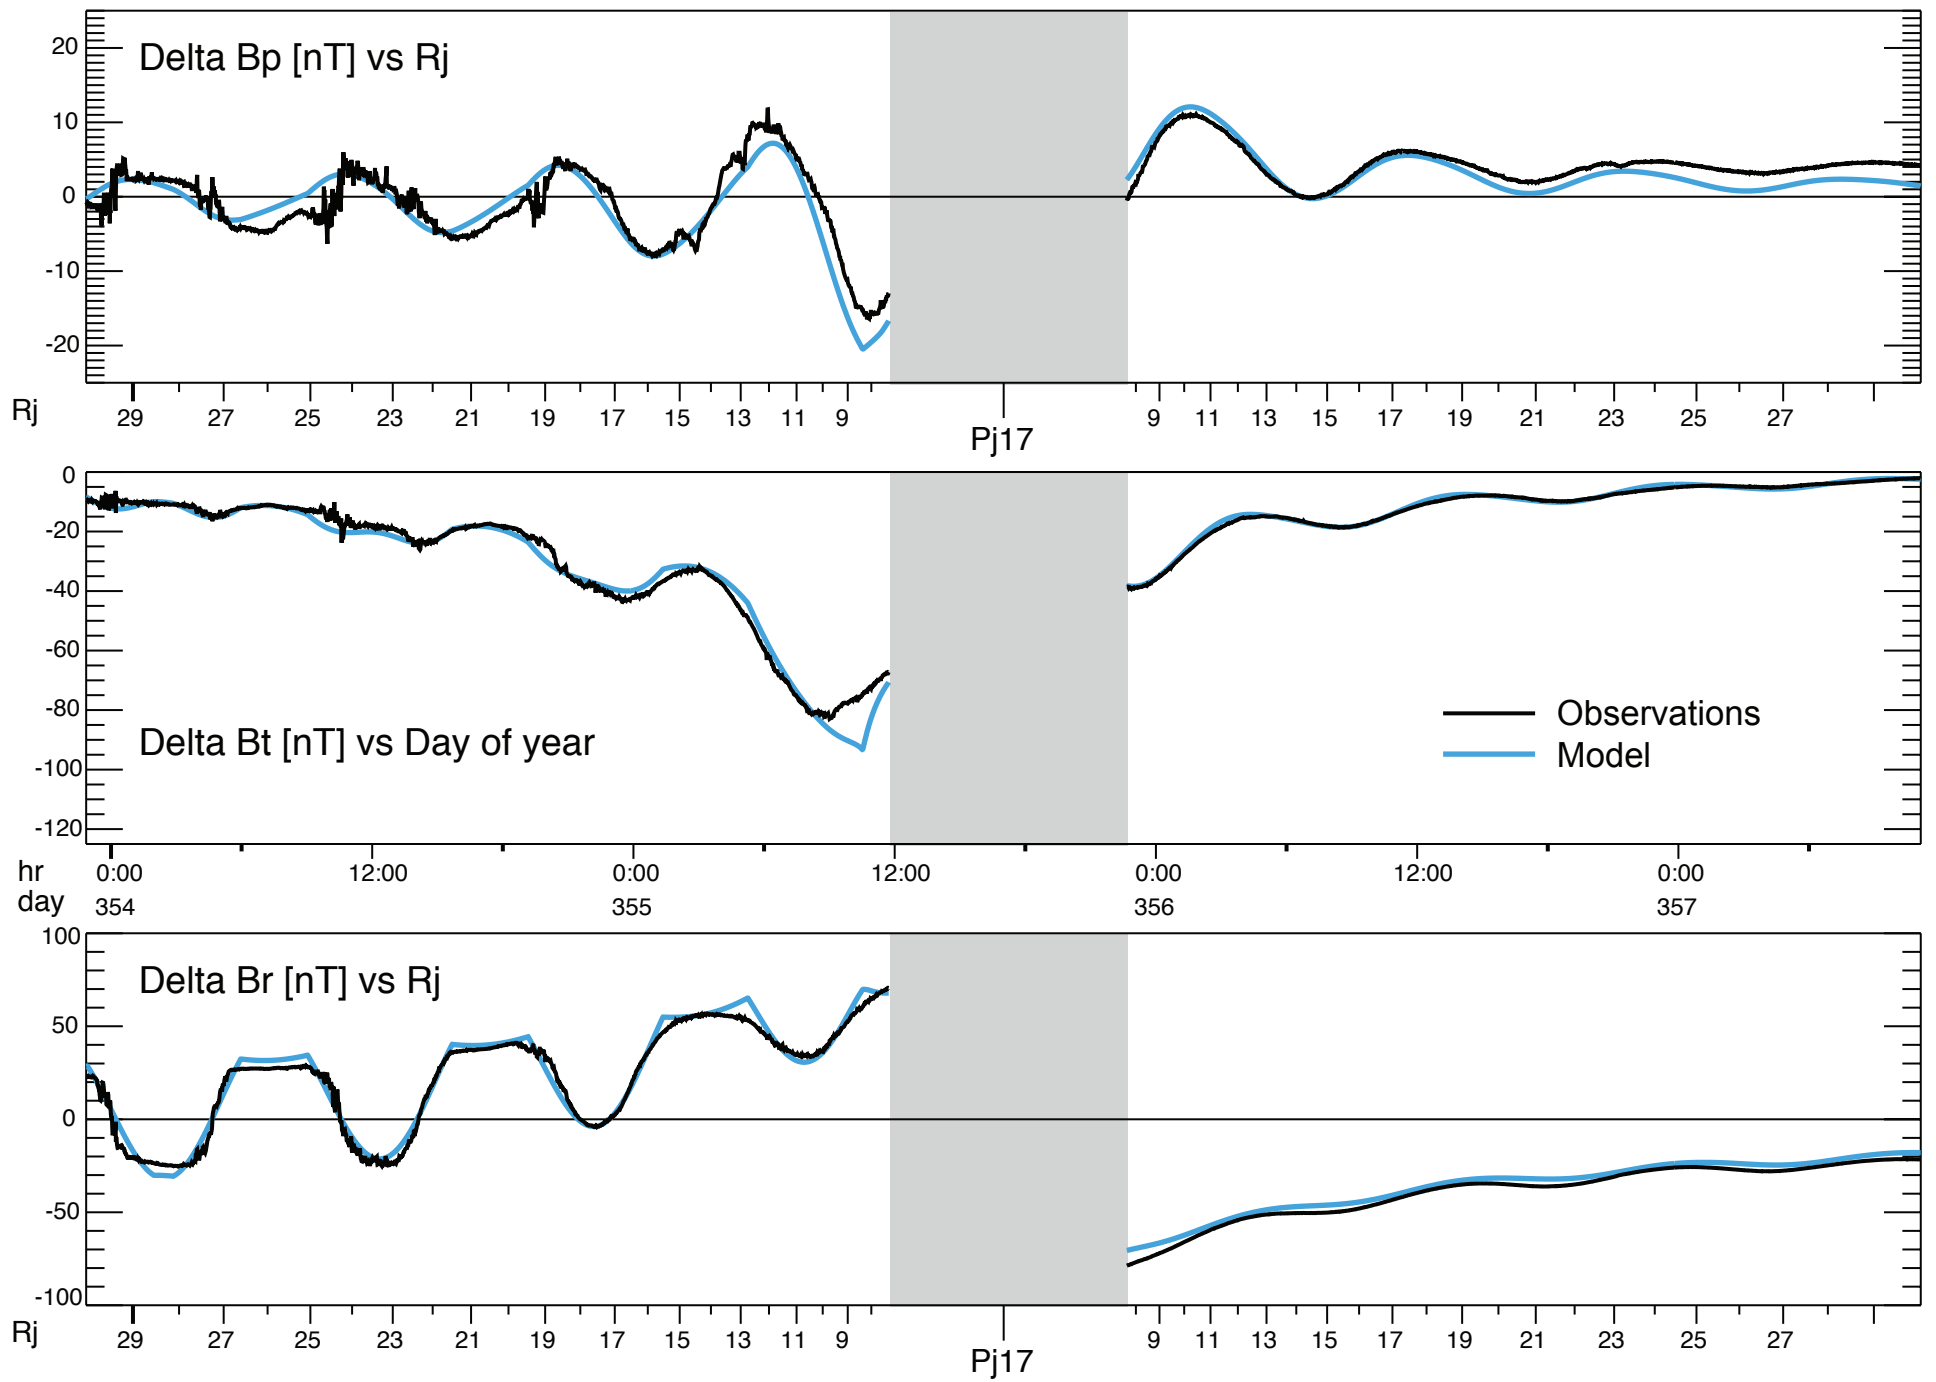

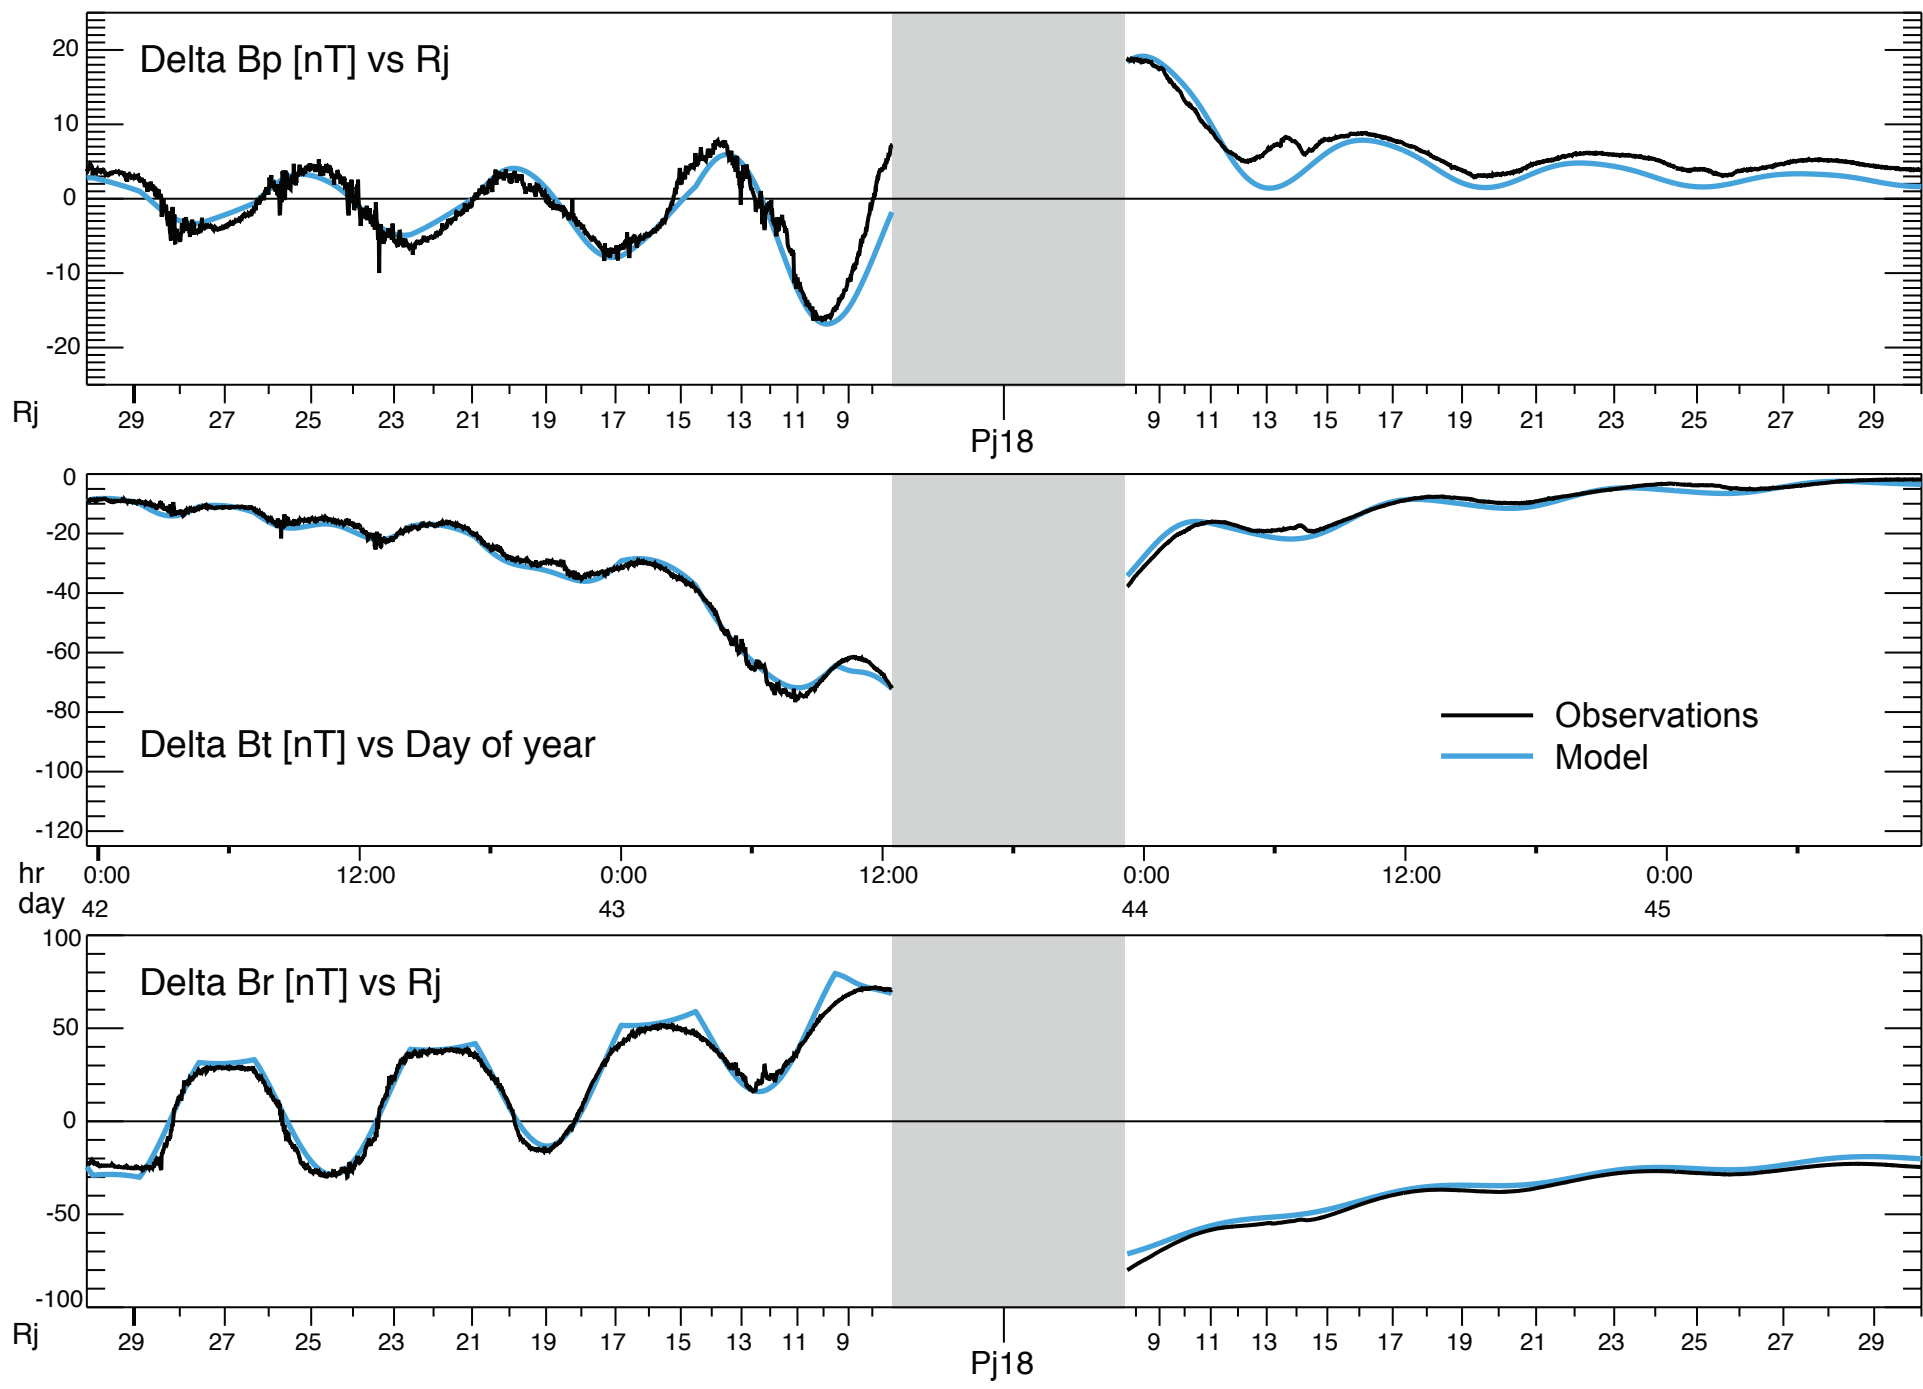

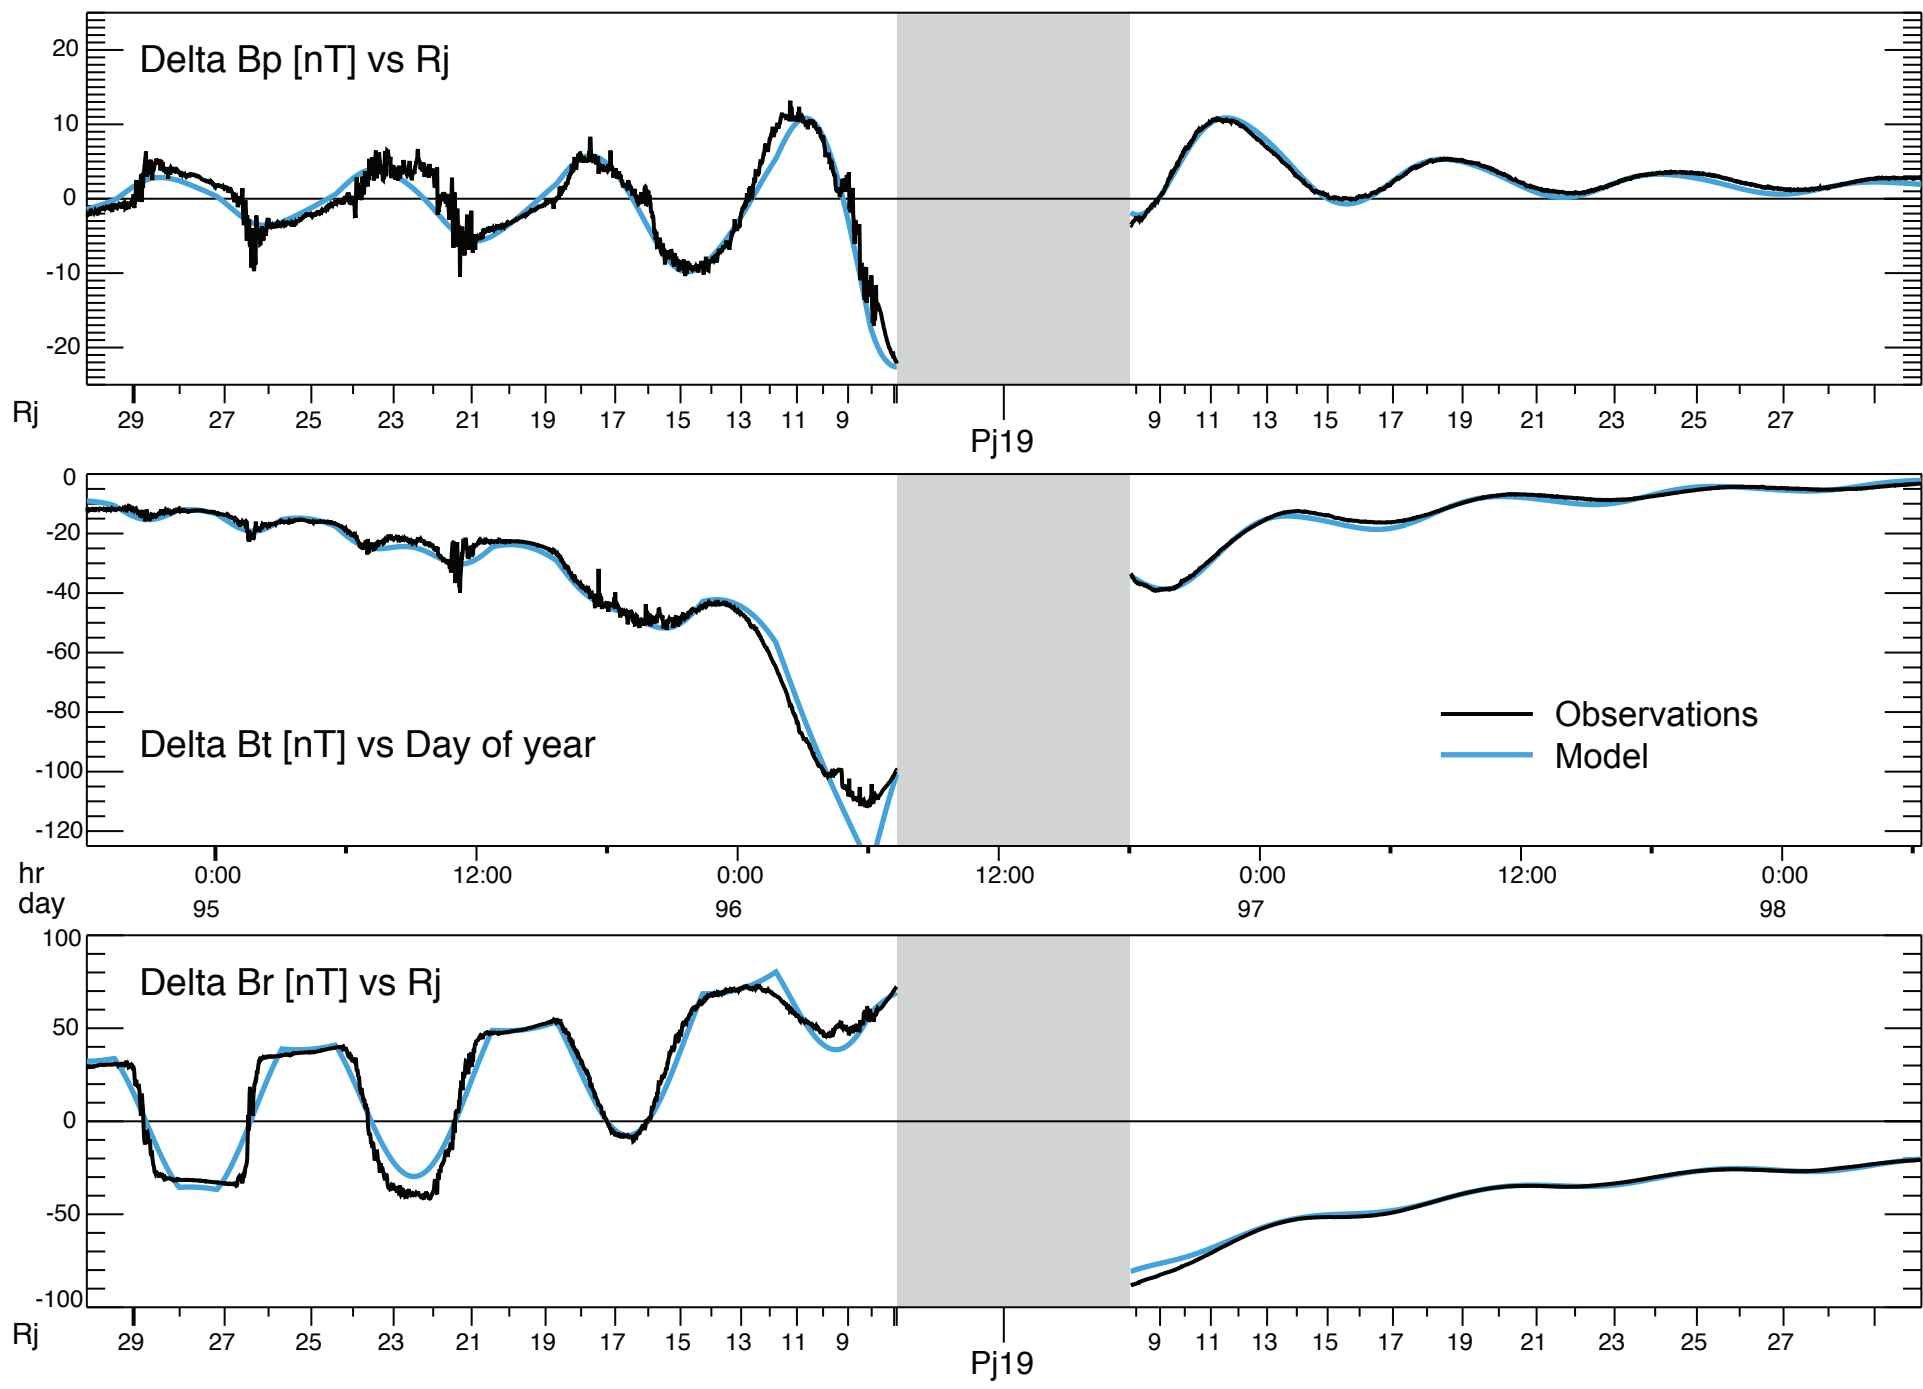

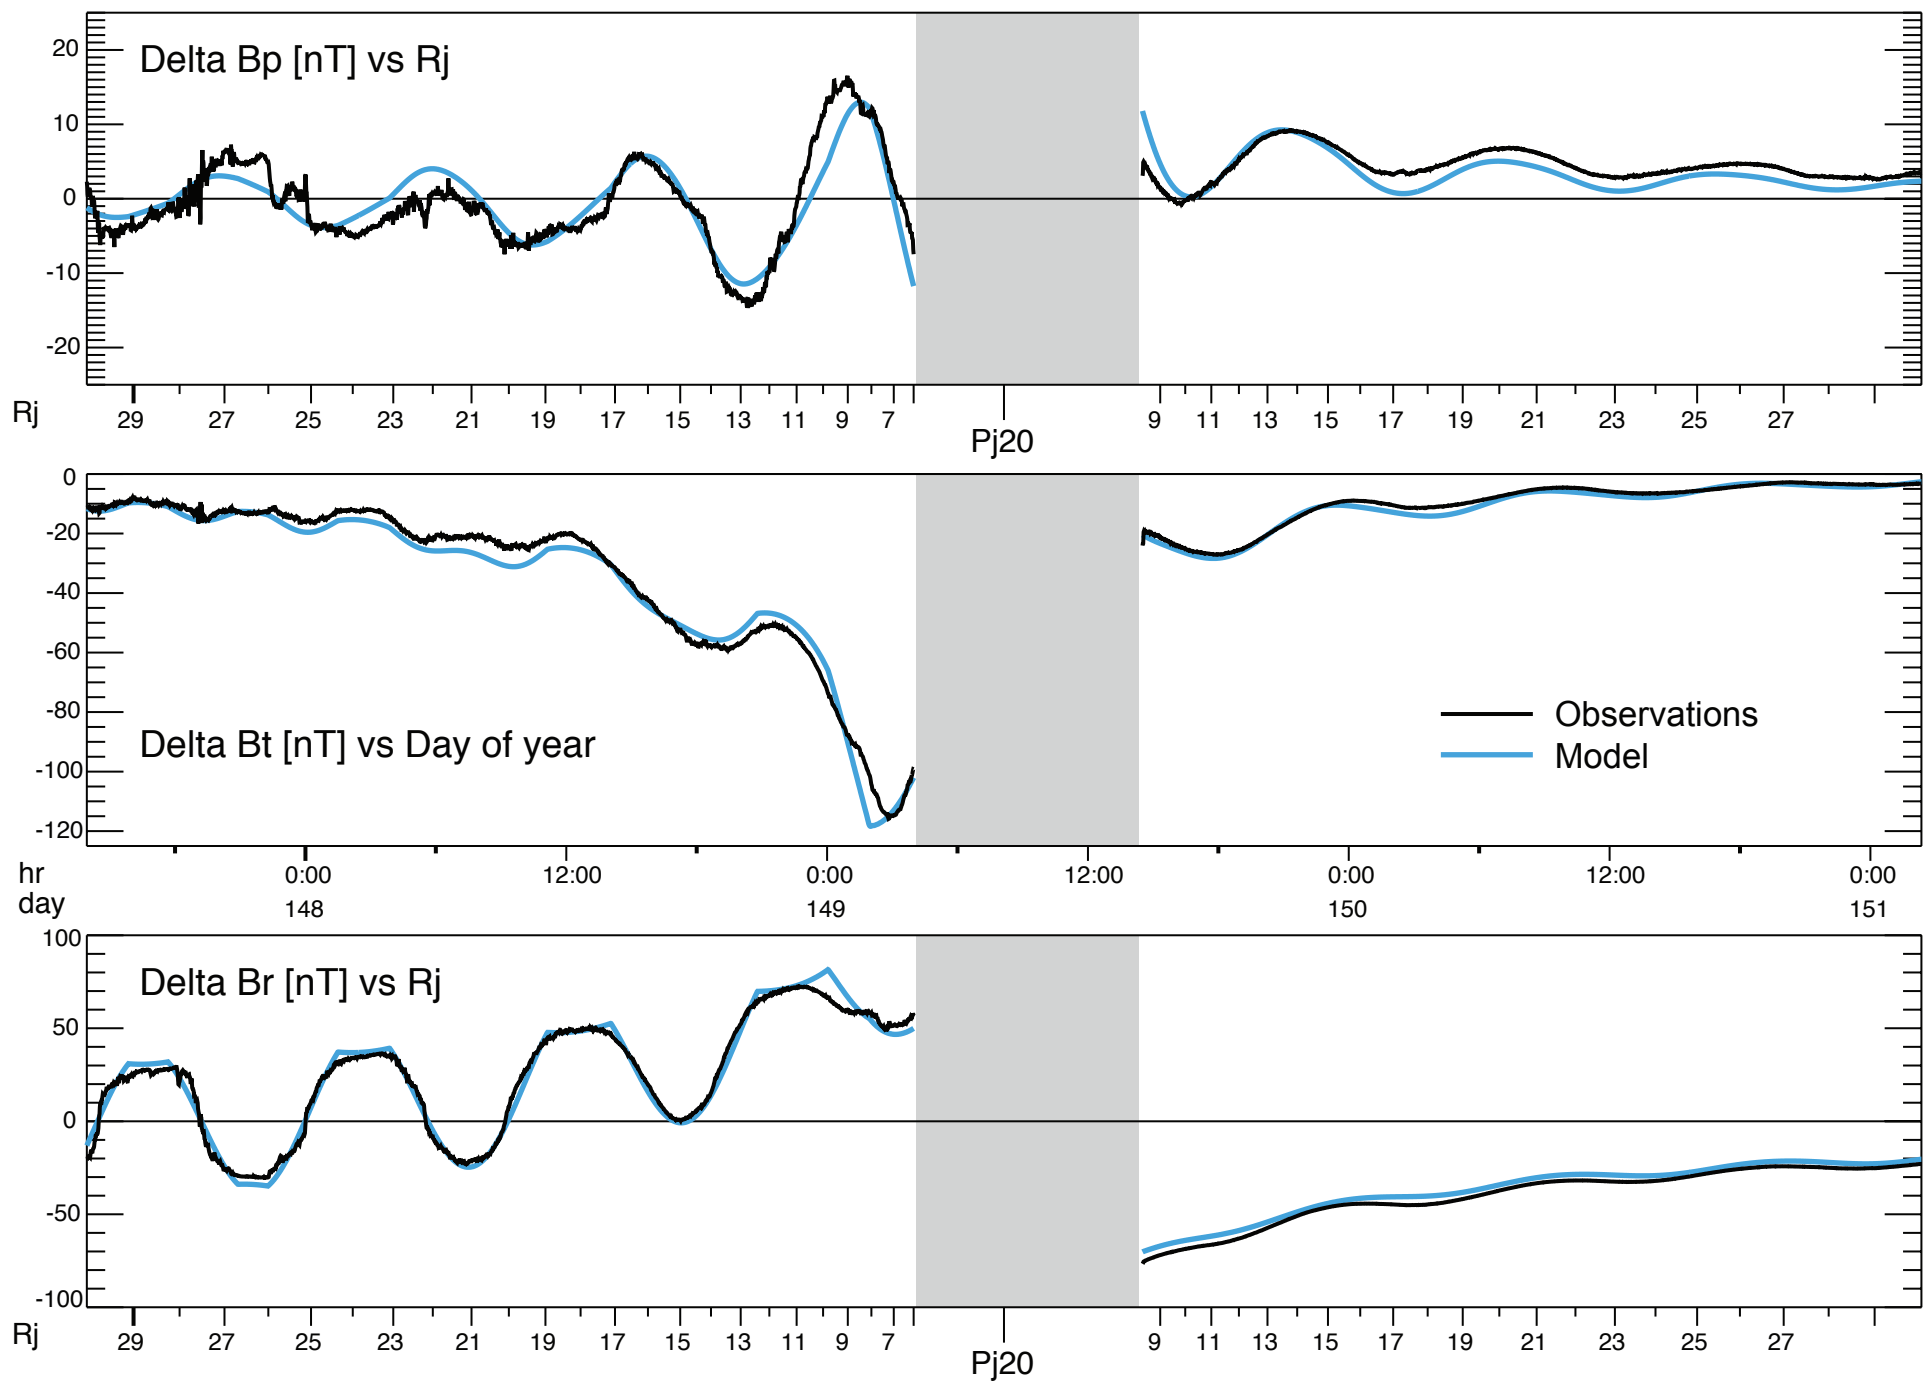

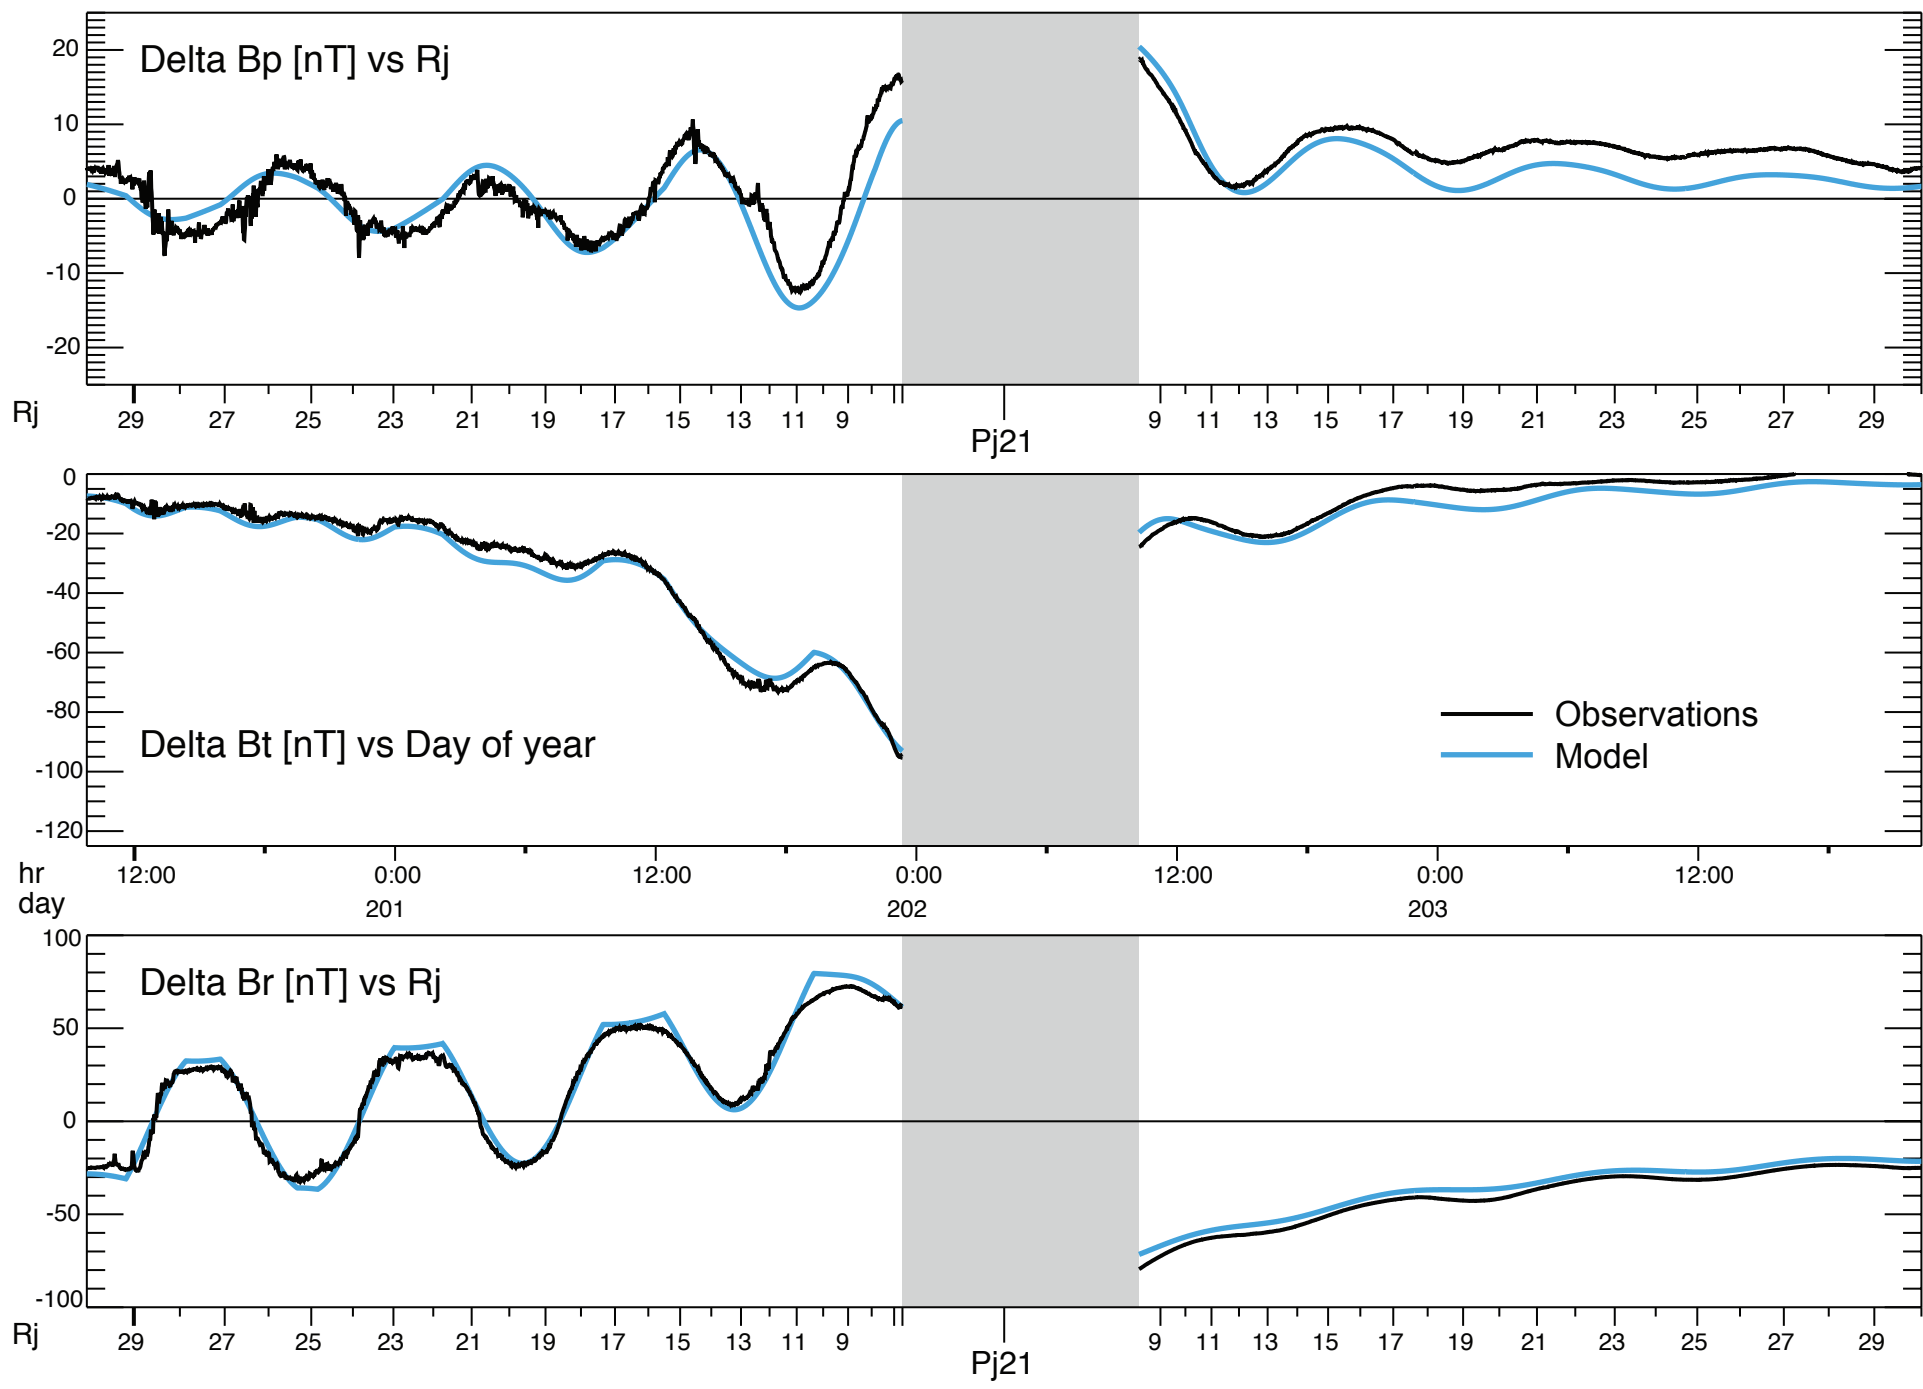

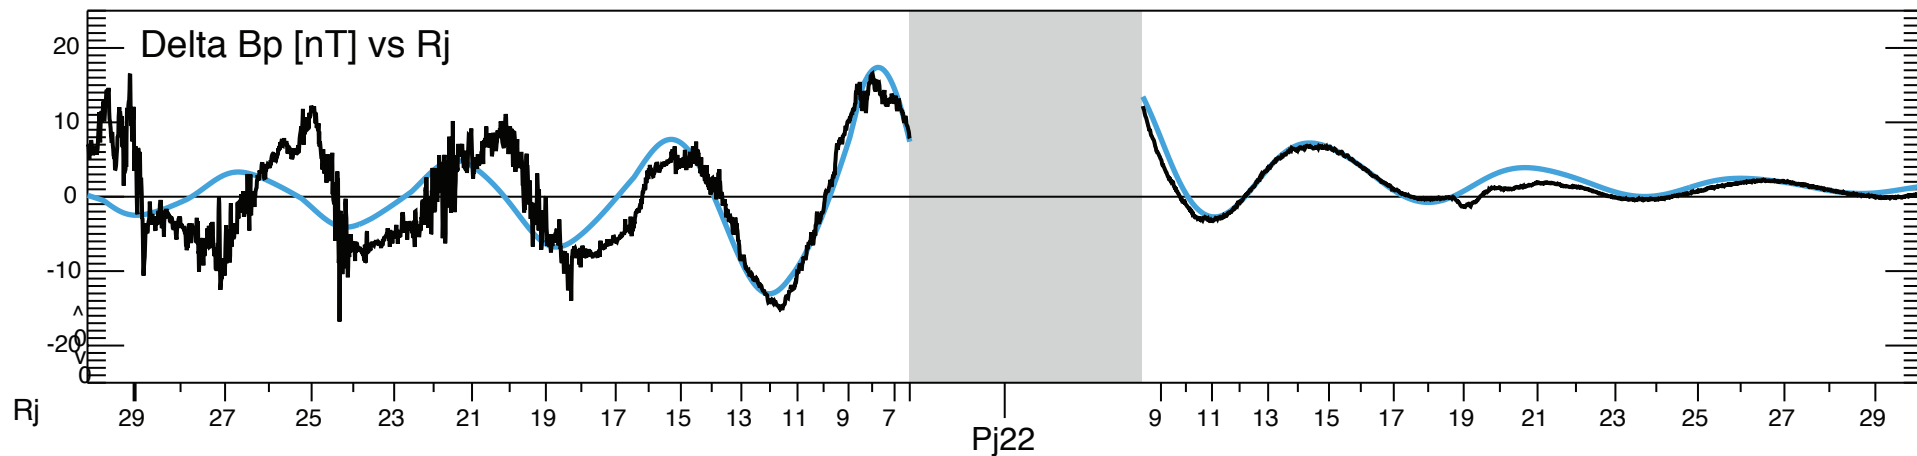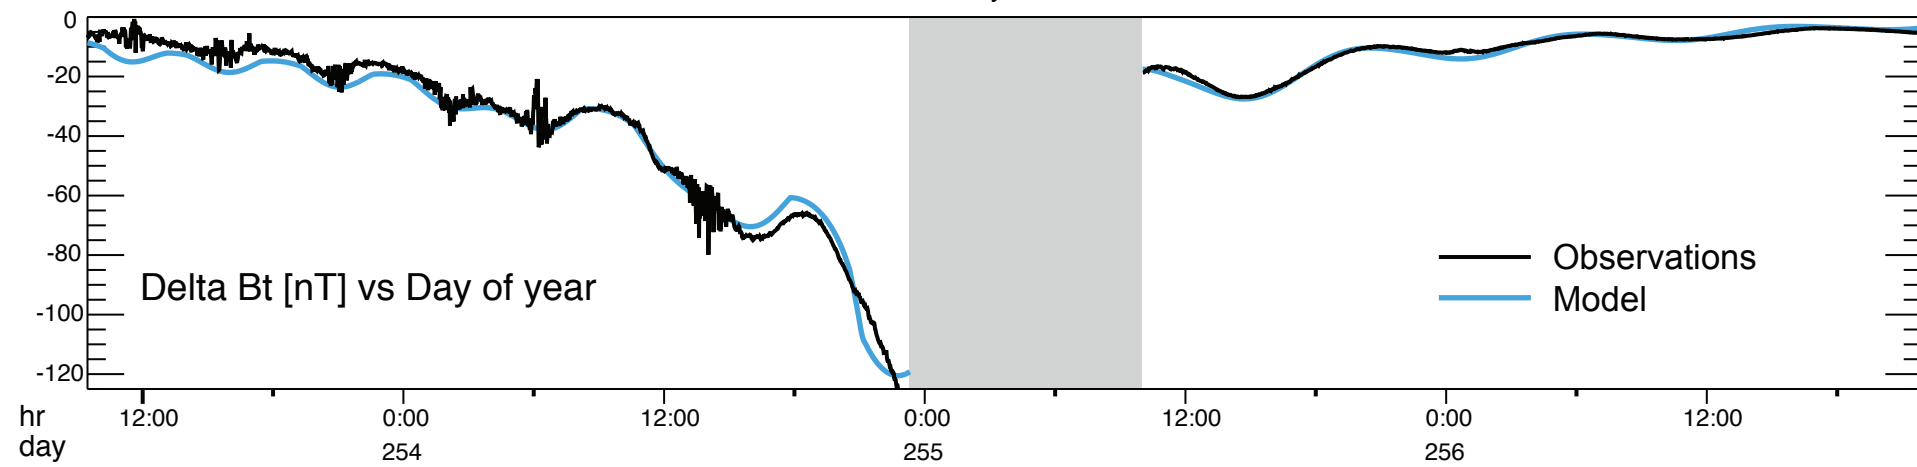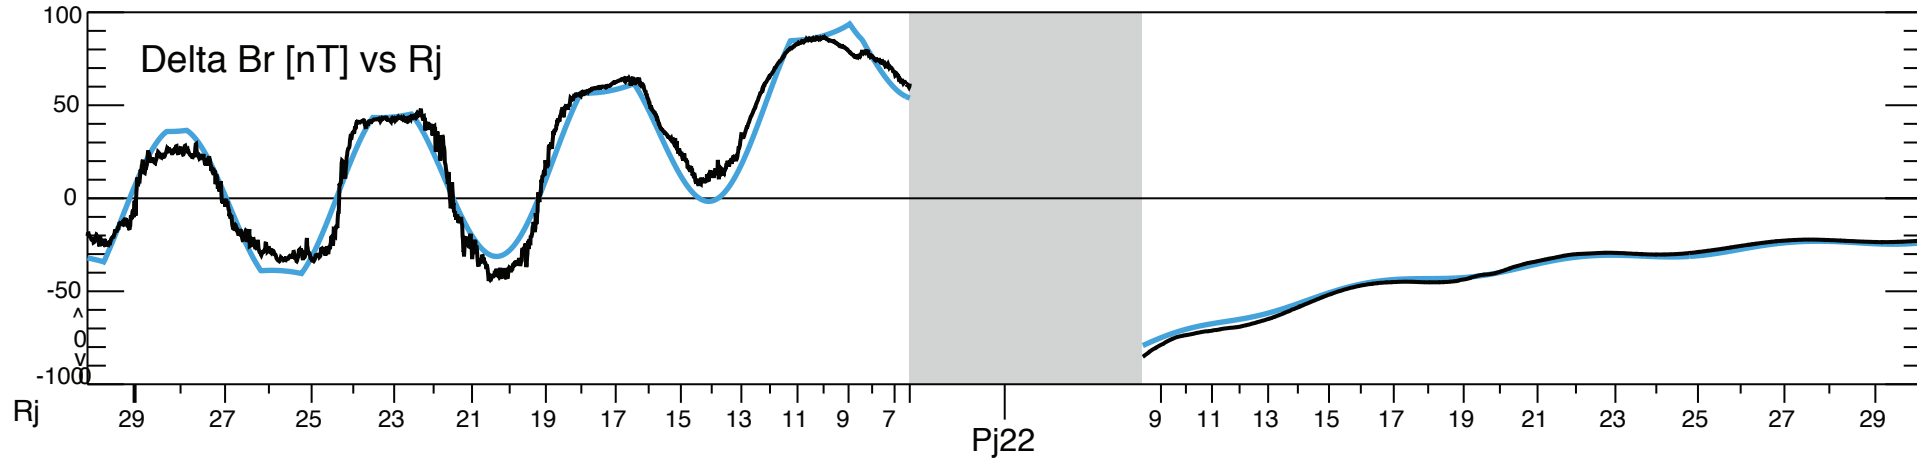

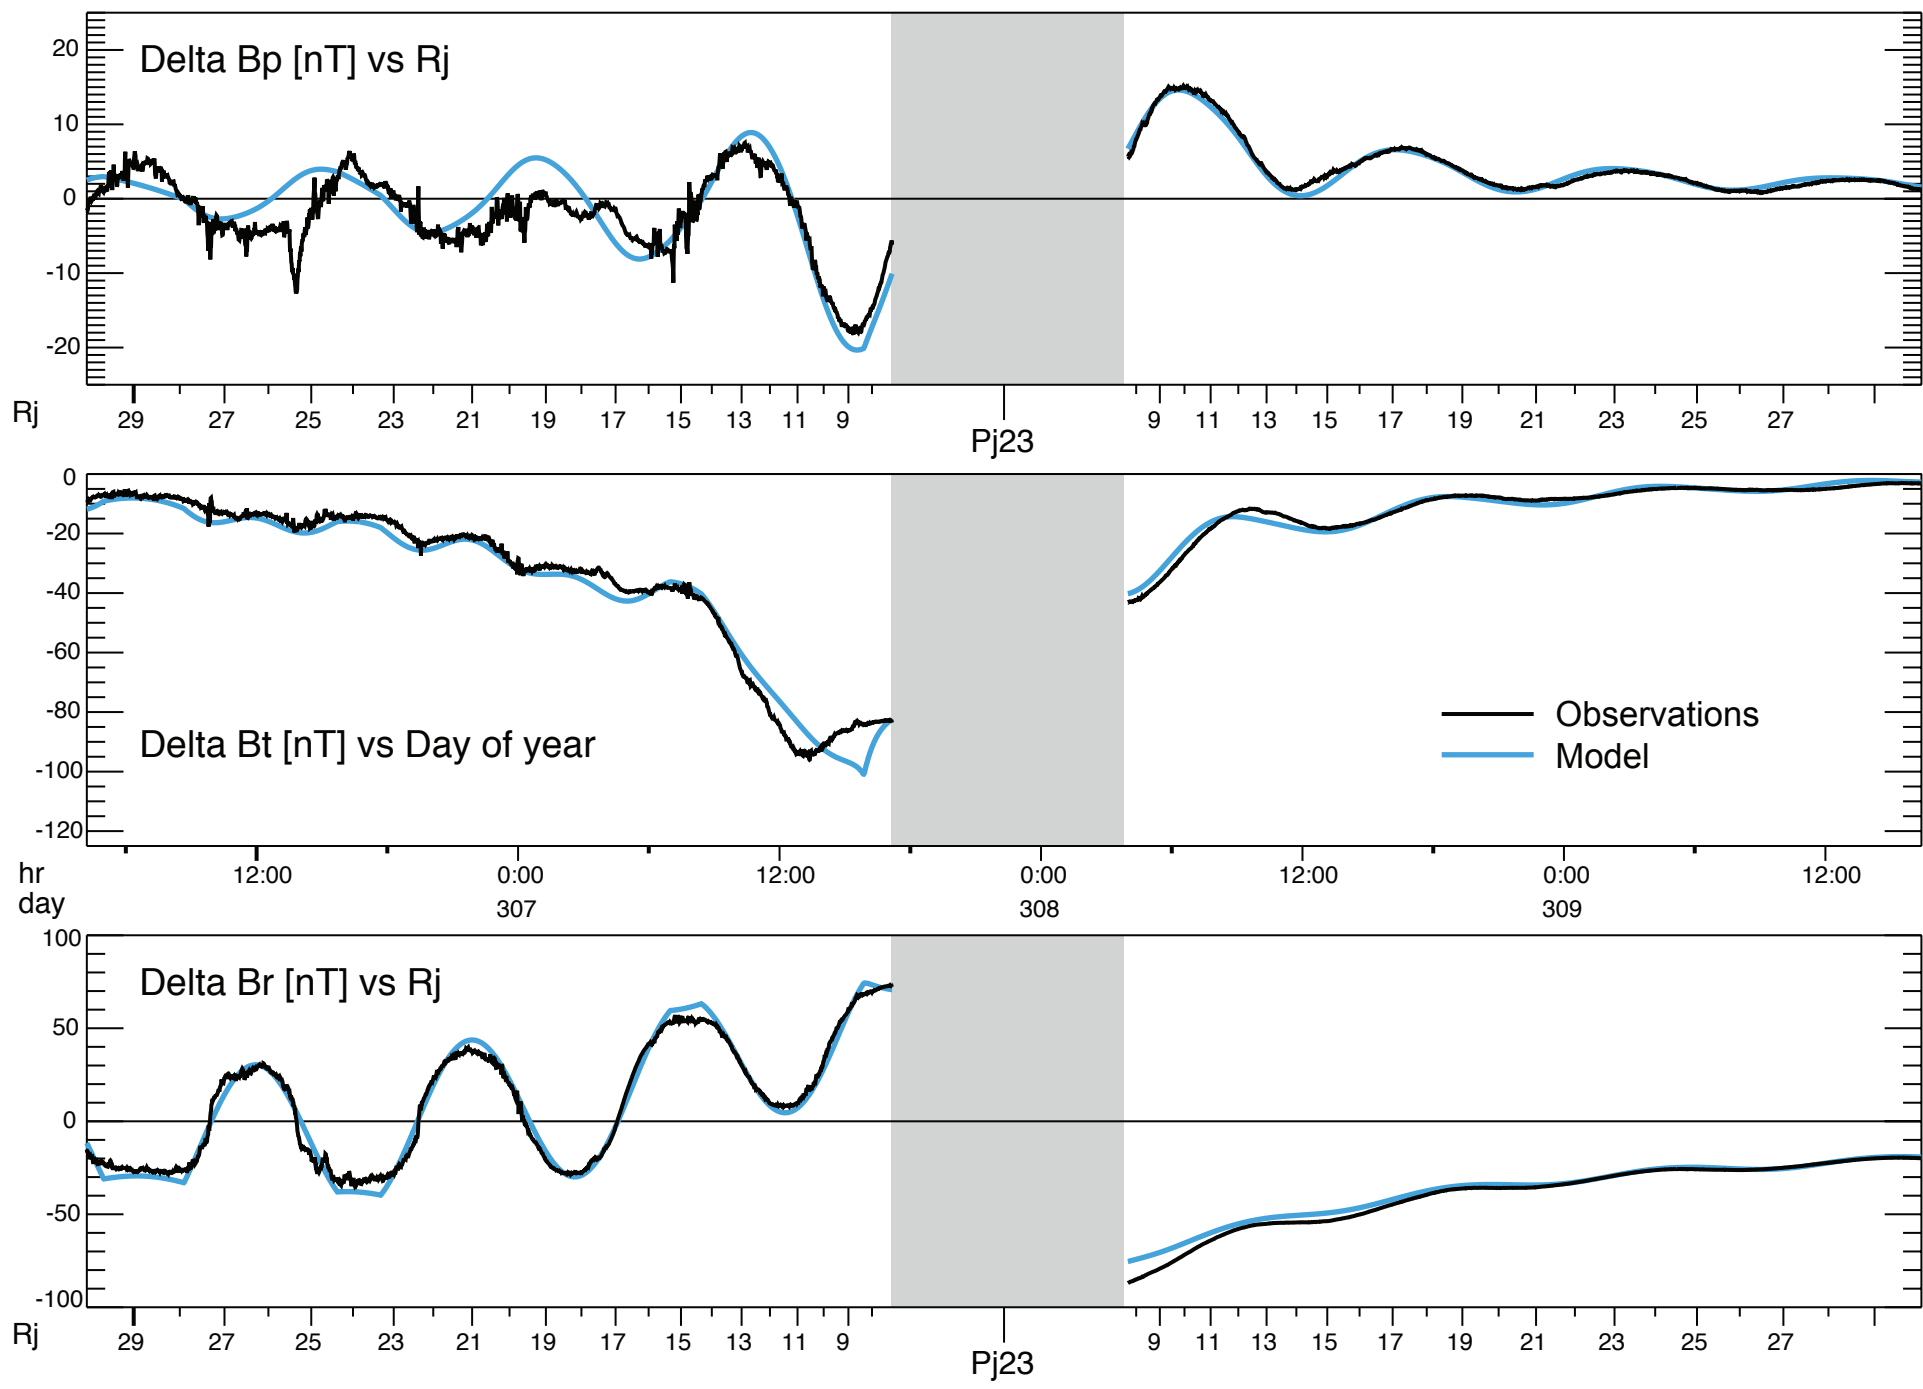



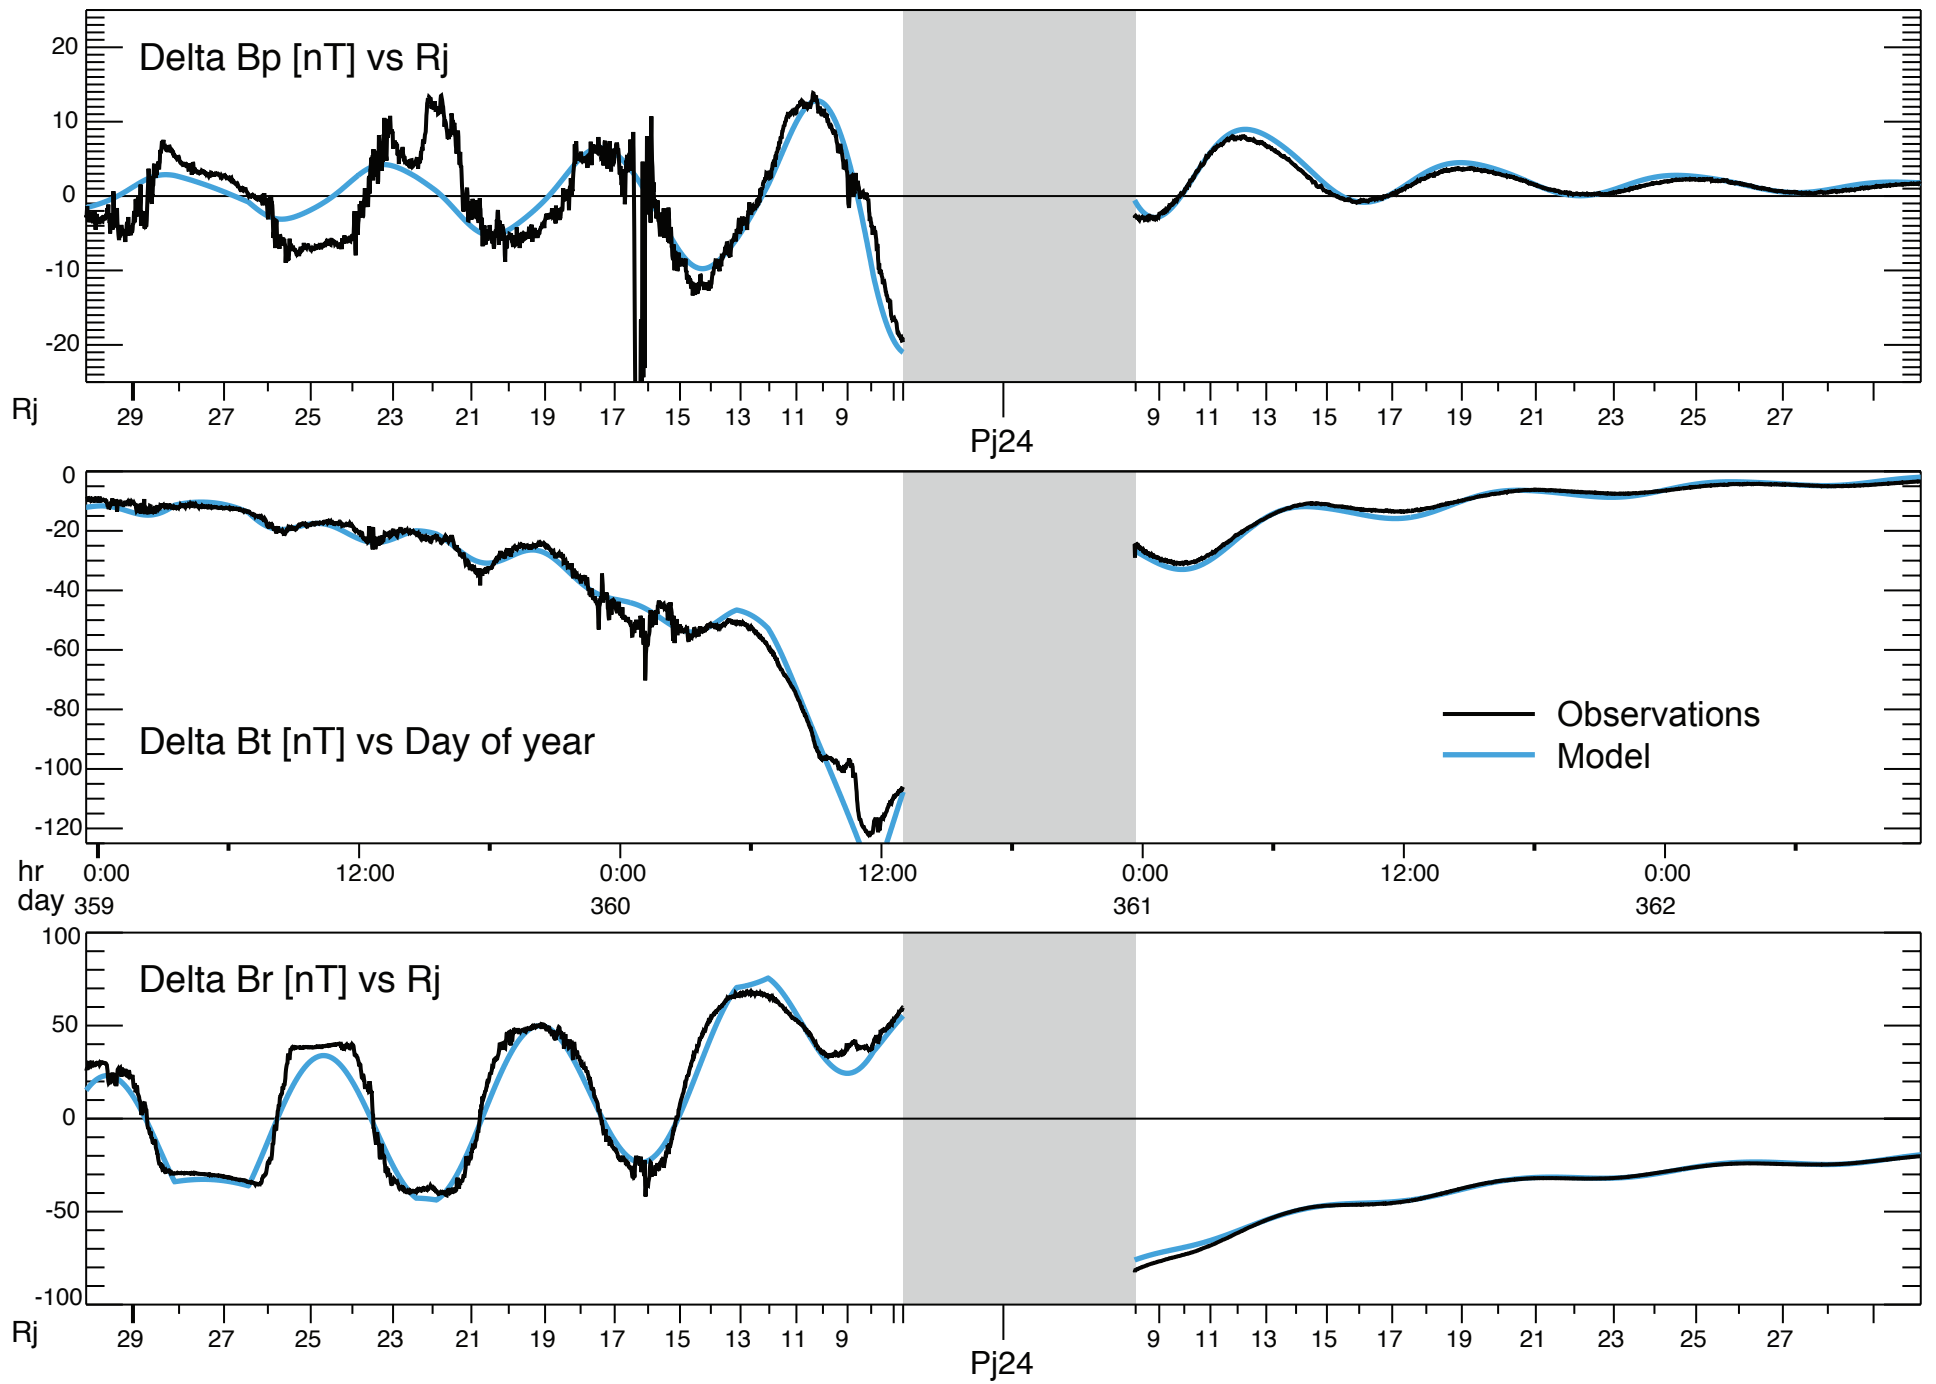

Supplement: JGRA-125-e2020JA028138-s001.pdf [file JGRA-125-e2020JA028138-s001.pdf]
